# Supplementary material for: Adjusting the water-sensitivity of sugar/boronate-based organogels
Source: Royal Society of Chemistry journal article supplement (doi:10.1039/d2sm01305c), 2022-01-01

## Electronic Supporting Information

|                                                                                                                            |           |
|----------------------------------------------------------------------------------------------------------------------------|-----------|
| <b>S1. <math>^1\text{H}</math>, <math>^{13}\text{C}</math> AND <math>^{11}\text{B}</math> NMR SPECTRA OF NEW COMPOUNDS</b> | <b>2</b>  |
| <b>S2. RHEOMETRY OF GELS IN CYCLOHEXANE AND ETHYL MYRISTATE</b>                                                            | <b>26</b> |
| <b>S3. SEM IMAGES OF XEROGEL SAMPLES (X10 000), BAR = 1 <math>\mu\text{M}</math></b>                                       | <b>28</b> |
| <b>S4. SAXS ANALYSIS</b>                                                                                                   | <b>30</b> |
| <b>S5. HYDROLYSIS EXPERIMENTS</b>                                                                                          | <b>32</b> |
| <b>S6. THEORITICAL AND COMPUTATIONAL PART</b>                                                                              | <b>33</b> |
| <b>S7. GELATION DATA IN HANSEN SPACE</b>                                                                                   | <b>39</b> |
| <b>S8. <math>^1\text{H}</math> NMR AT VARIABLE TEMPERATURE</b>                                                             | <b>40</b> |

# S1. <sup>1</sup>H, <sup>13</sup>C and <sup>11</sup>B NMR spectra of new compounds

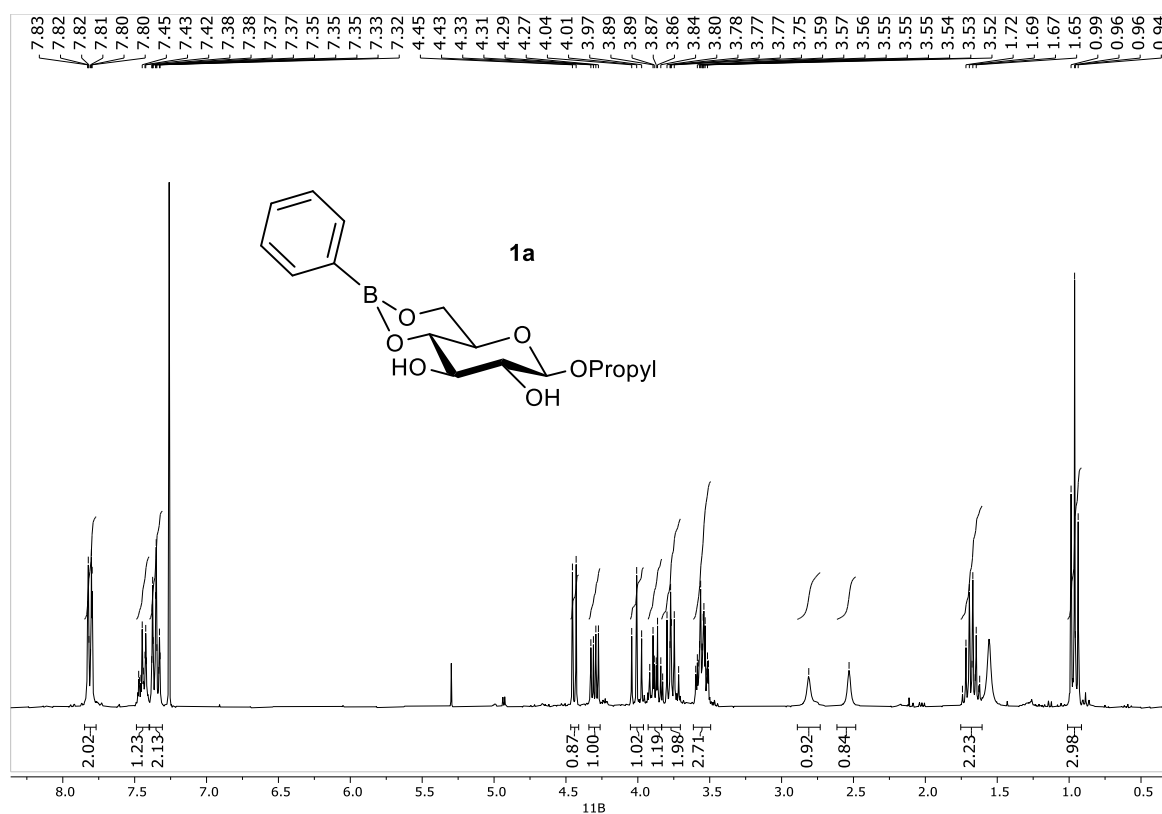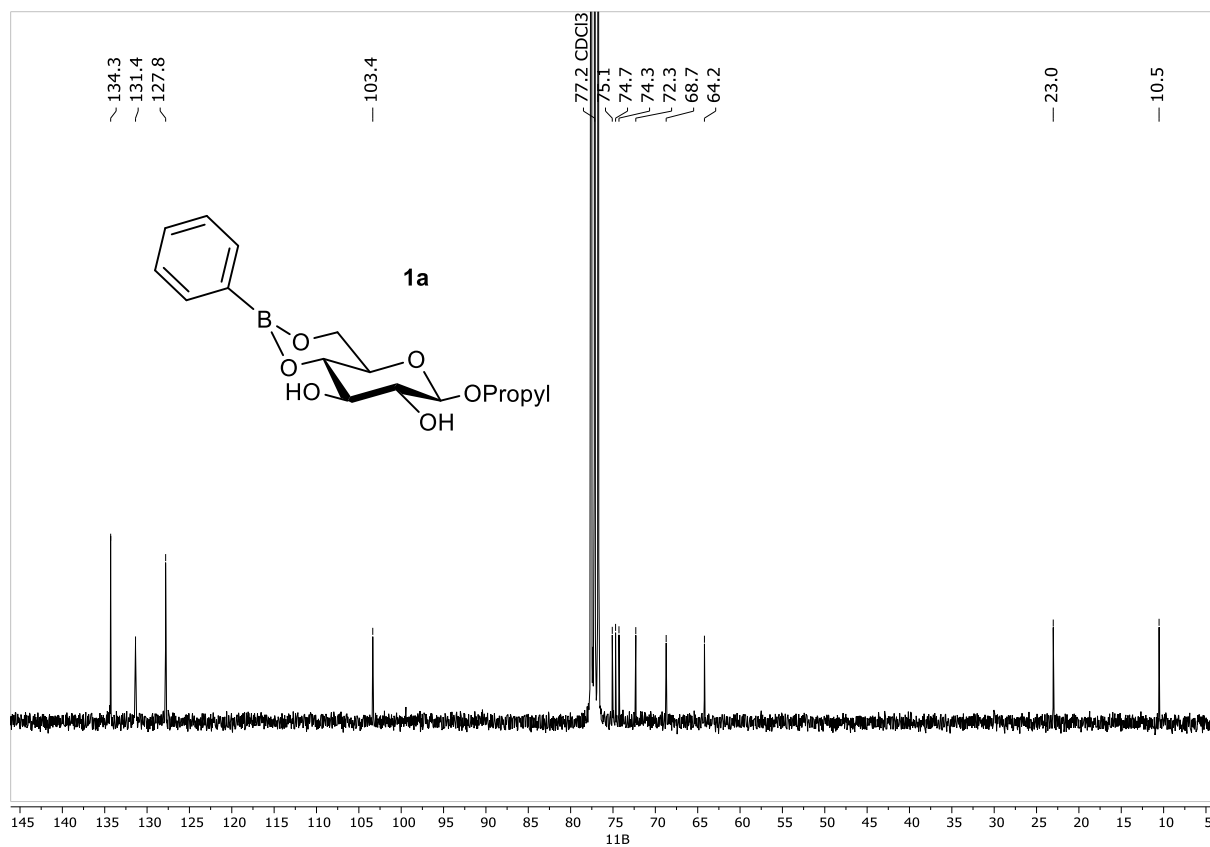

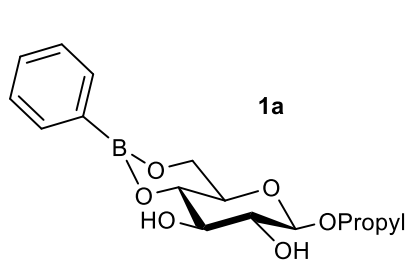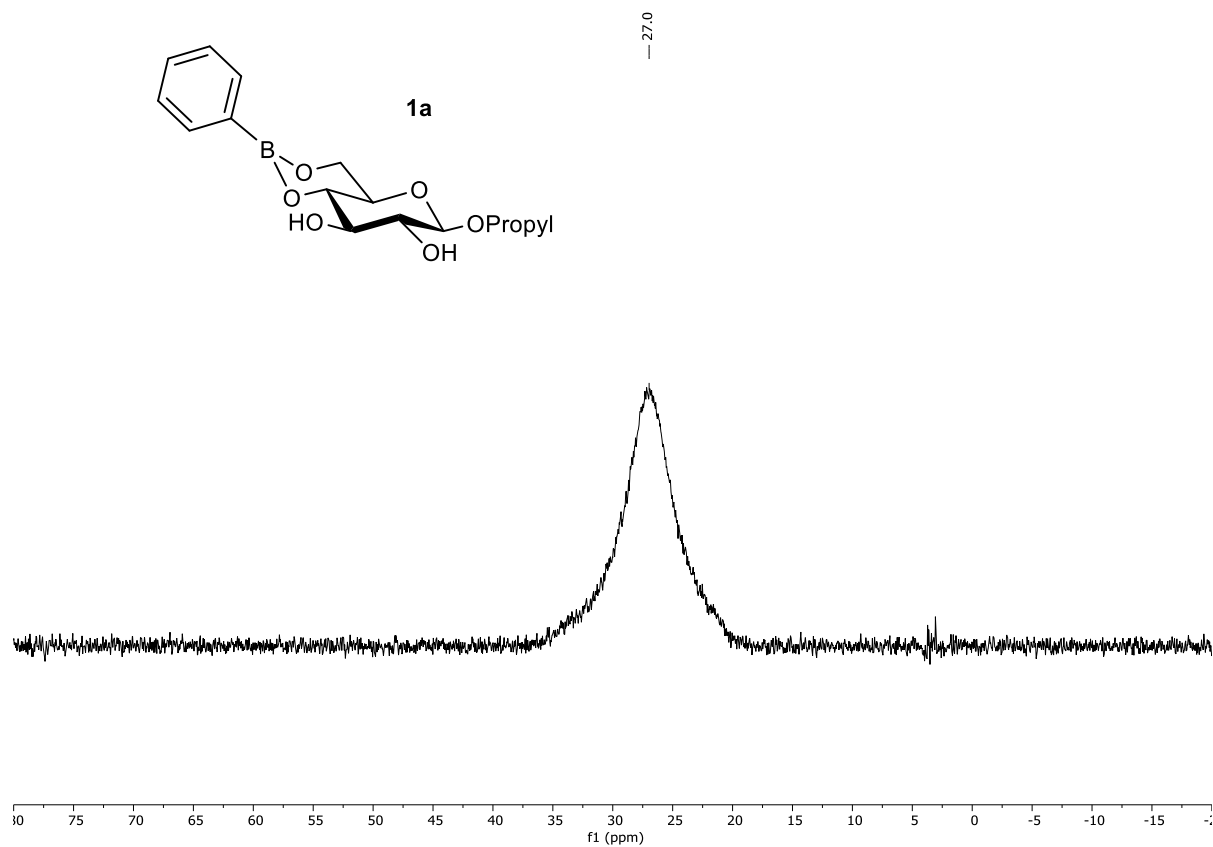

$^{11}\text{B}\{^1\text{H}\}$  NMR ( $\text{CDCl}_3$ , 96 MHz) of compound **1a**

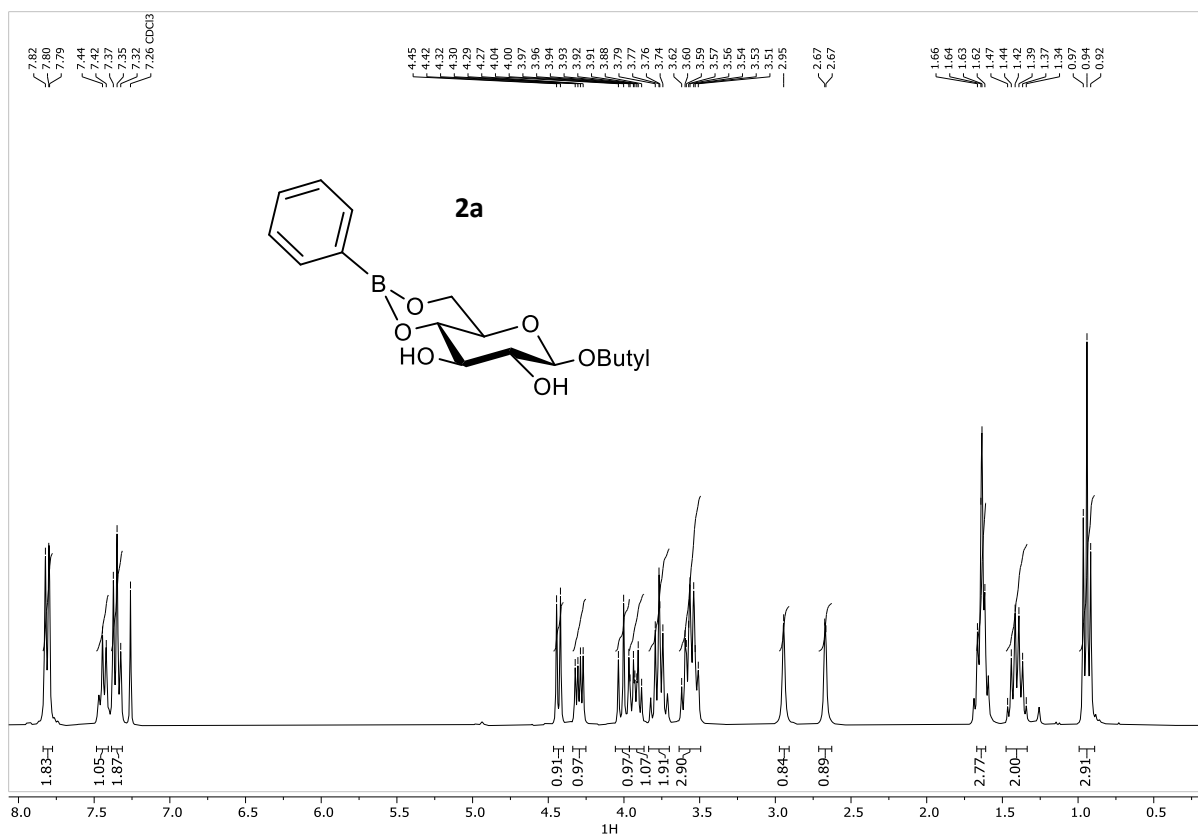

<sup>1</sup>H NMR spectrum (CDCl<sub>3</sub>, 300 MHz) of compound **2a**

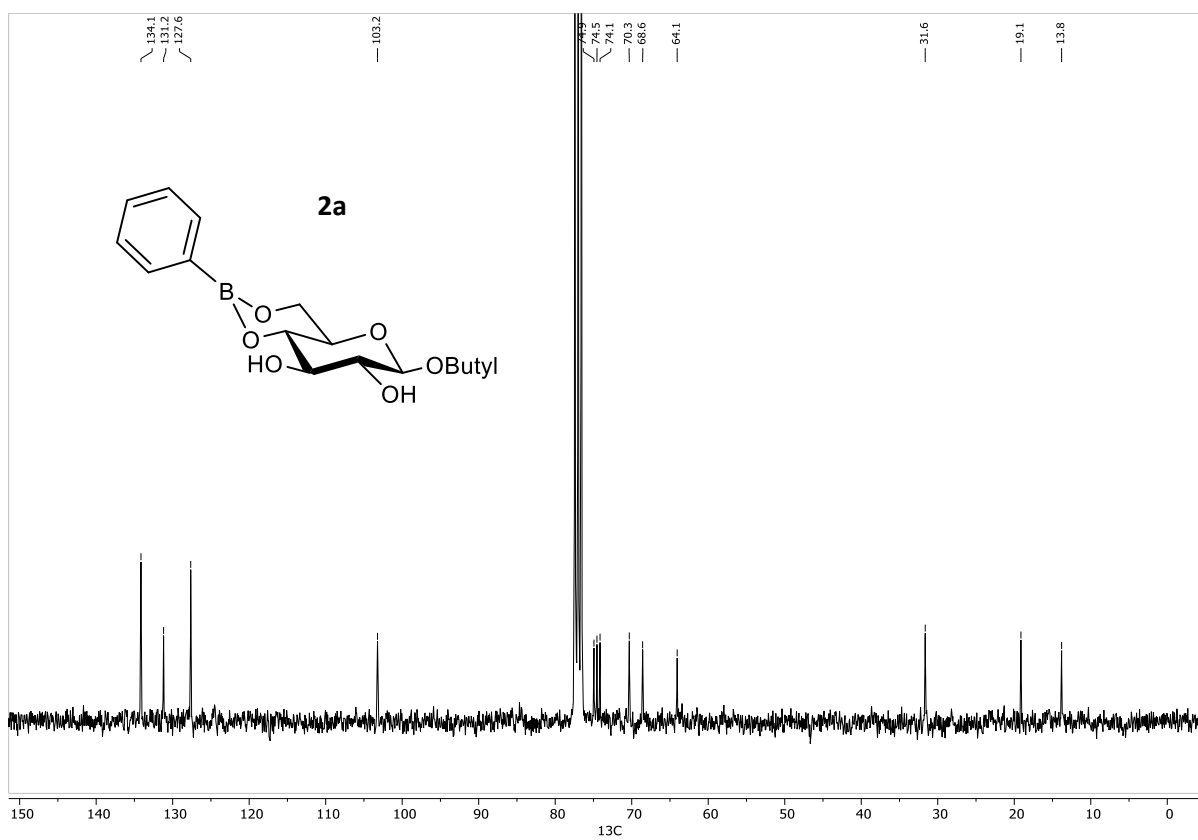

<sup>13</sup>C NMR spectrum (CDCl<sub>3</sub>, 75 MHz) of compound **2a**



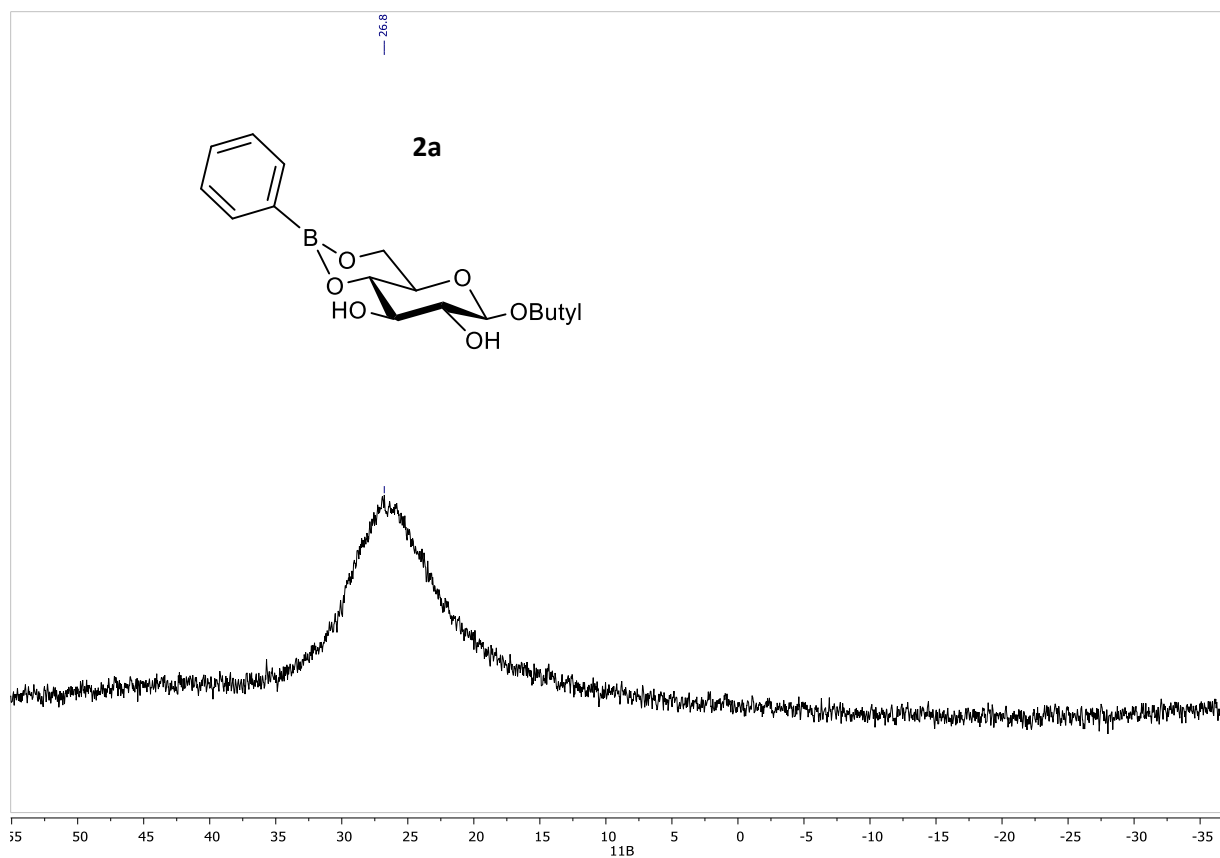

$^{11}\text{B}\{^1\text{H}\}$  NMR ( $\text{CDCl}_3$ , 96 MHz) of compound **2a**

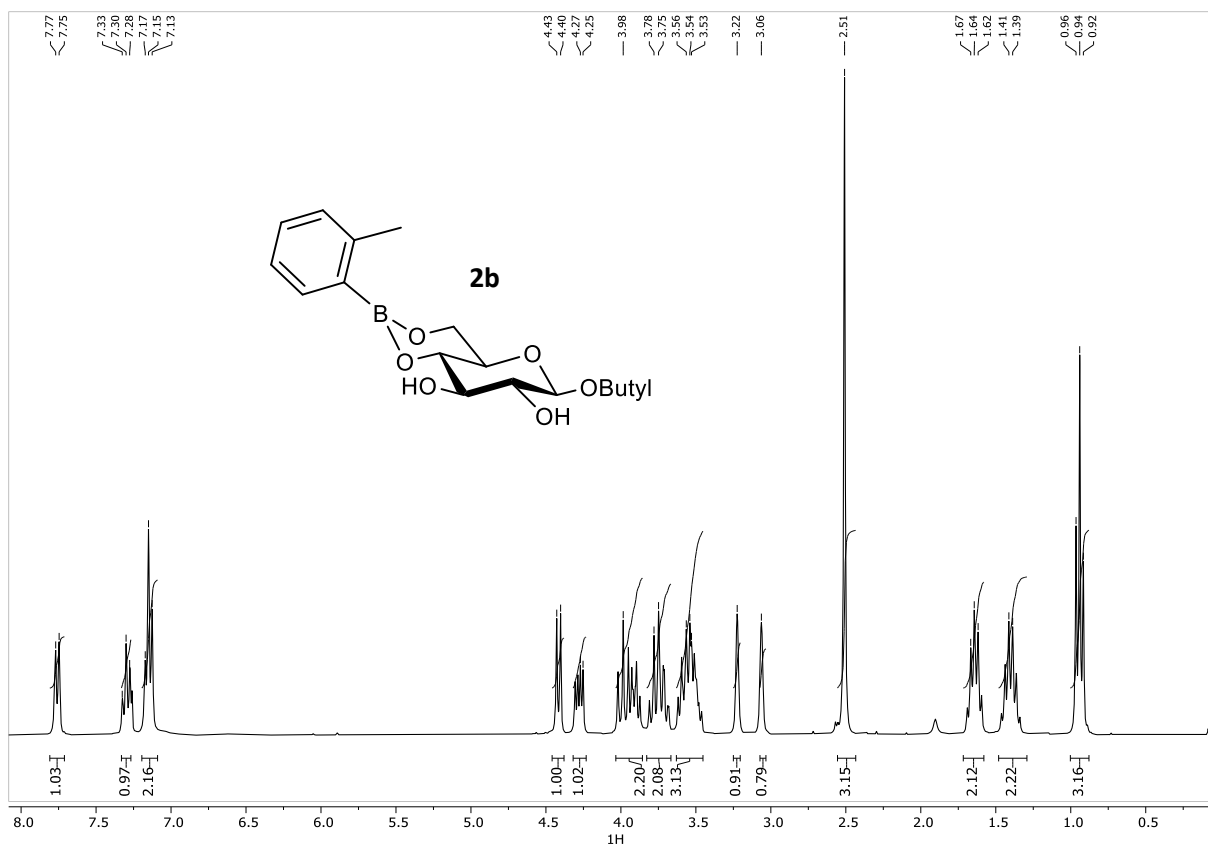

<sup>1</sup>H NMR spectrum (CDCl<sub>3</sub>, 300 MHz) of compound **2b**

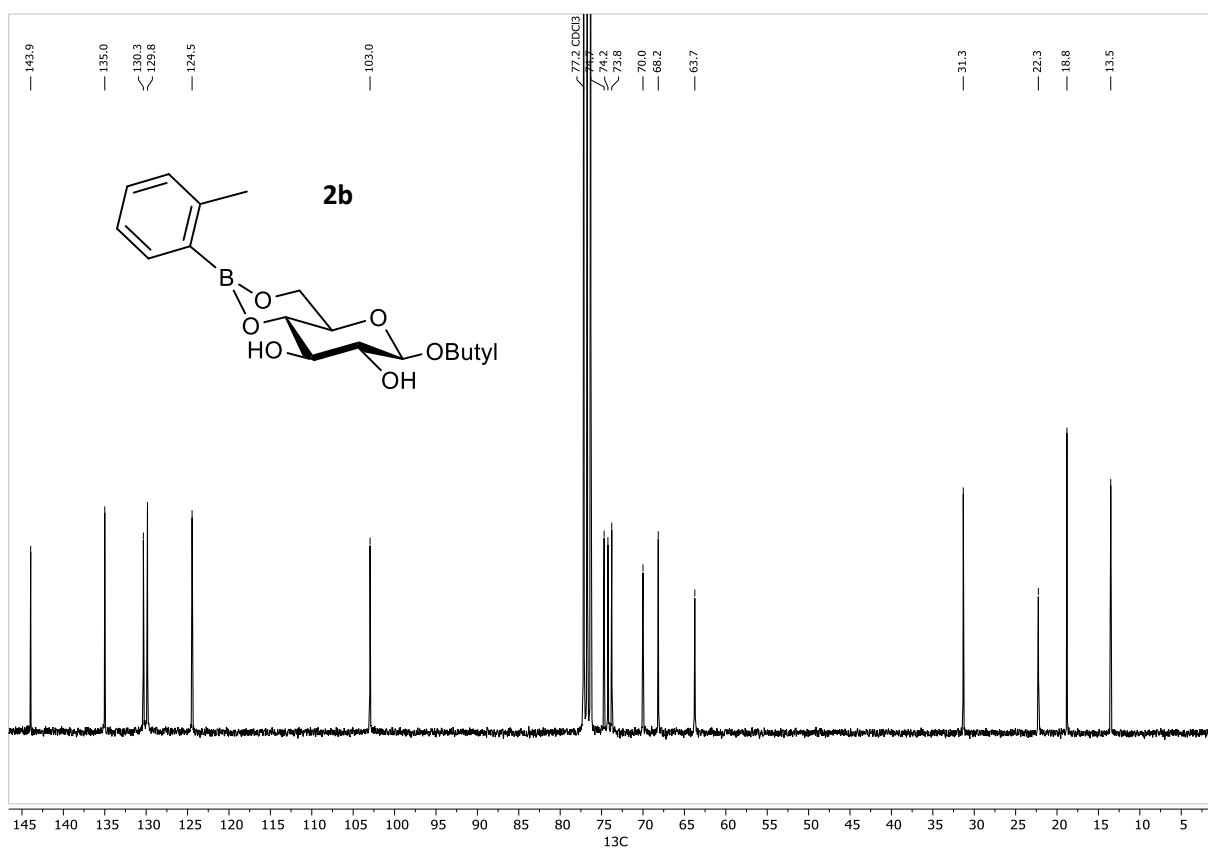

<sup>13</sup>C NMR spectrum (CDCl<sub>3</sub>, 75 MHz) of compound **2b**

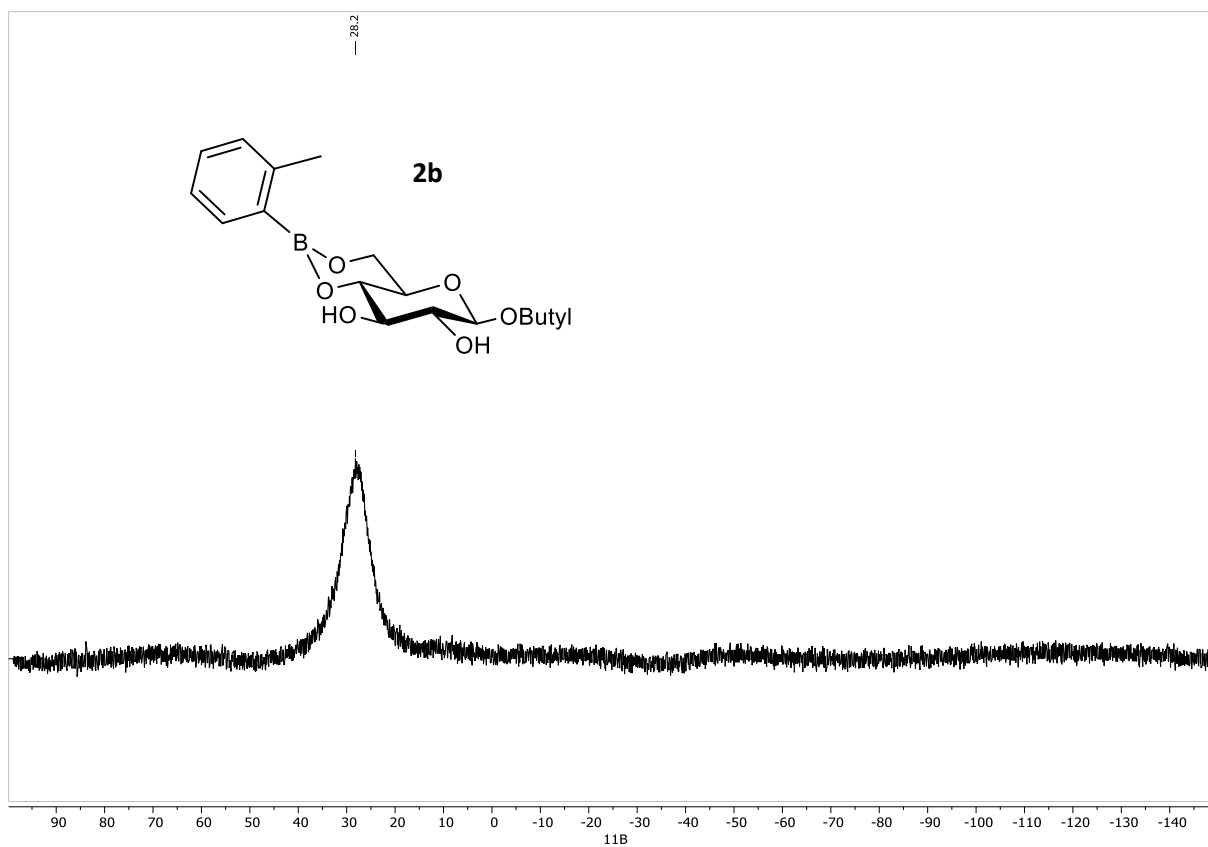

$^{11}\text{B}\{^1\text{H}\}$  NMR ( $\text{CDCl}_3$ , 96 MHz) of compound **2b**

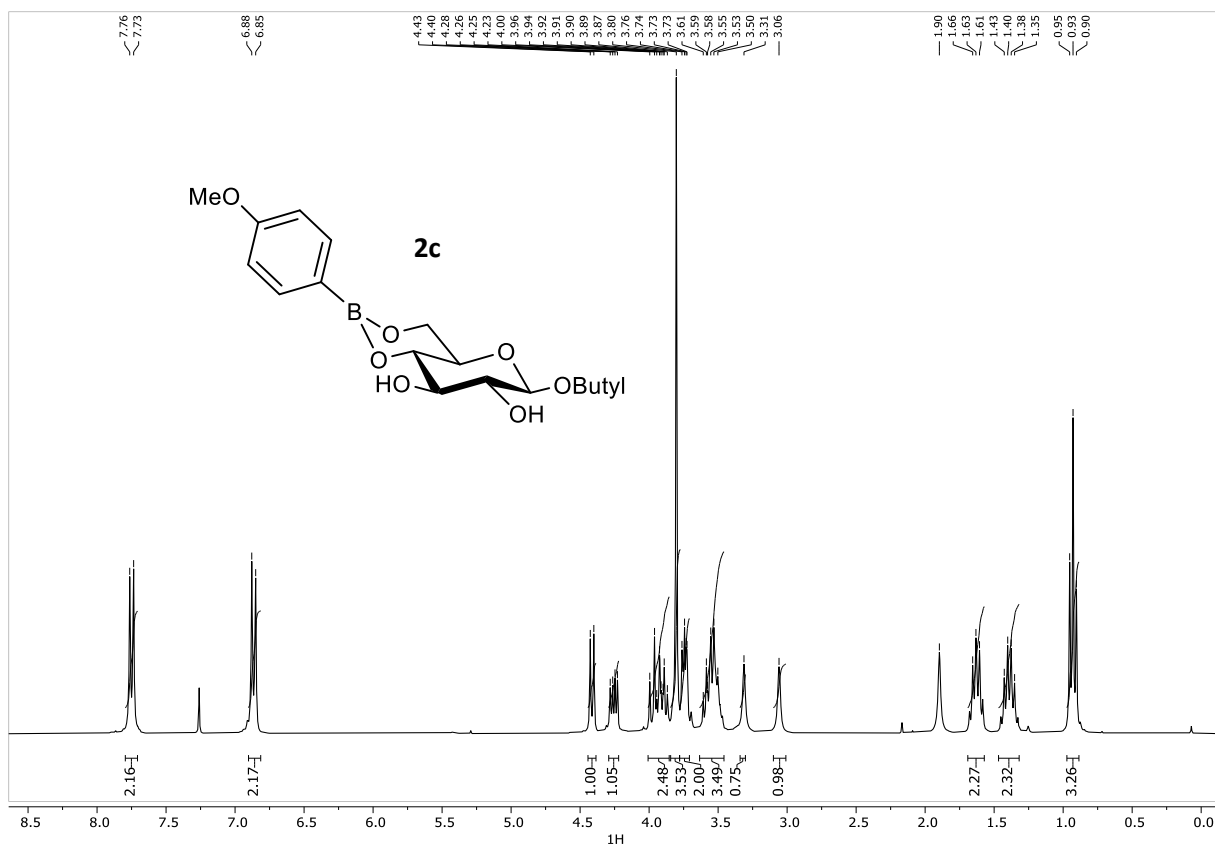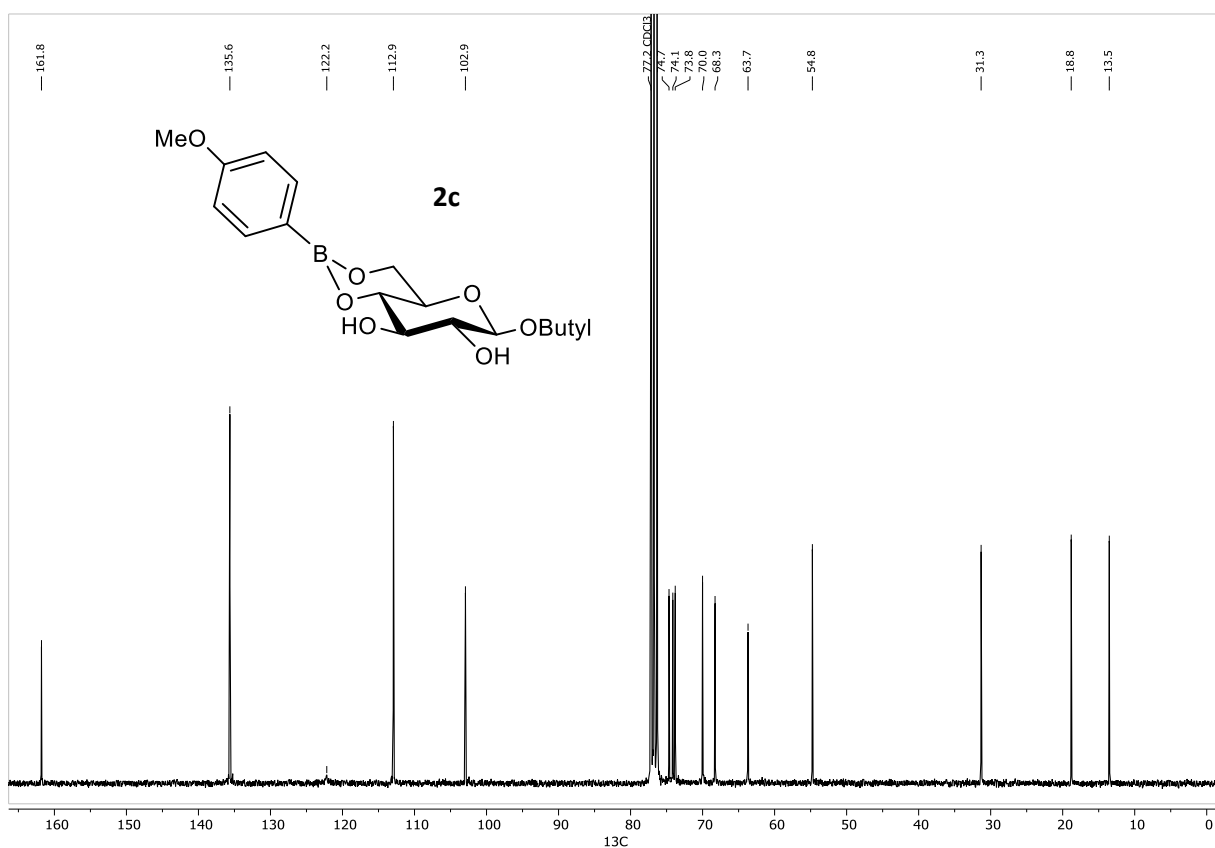

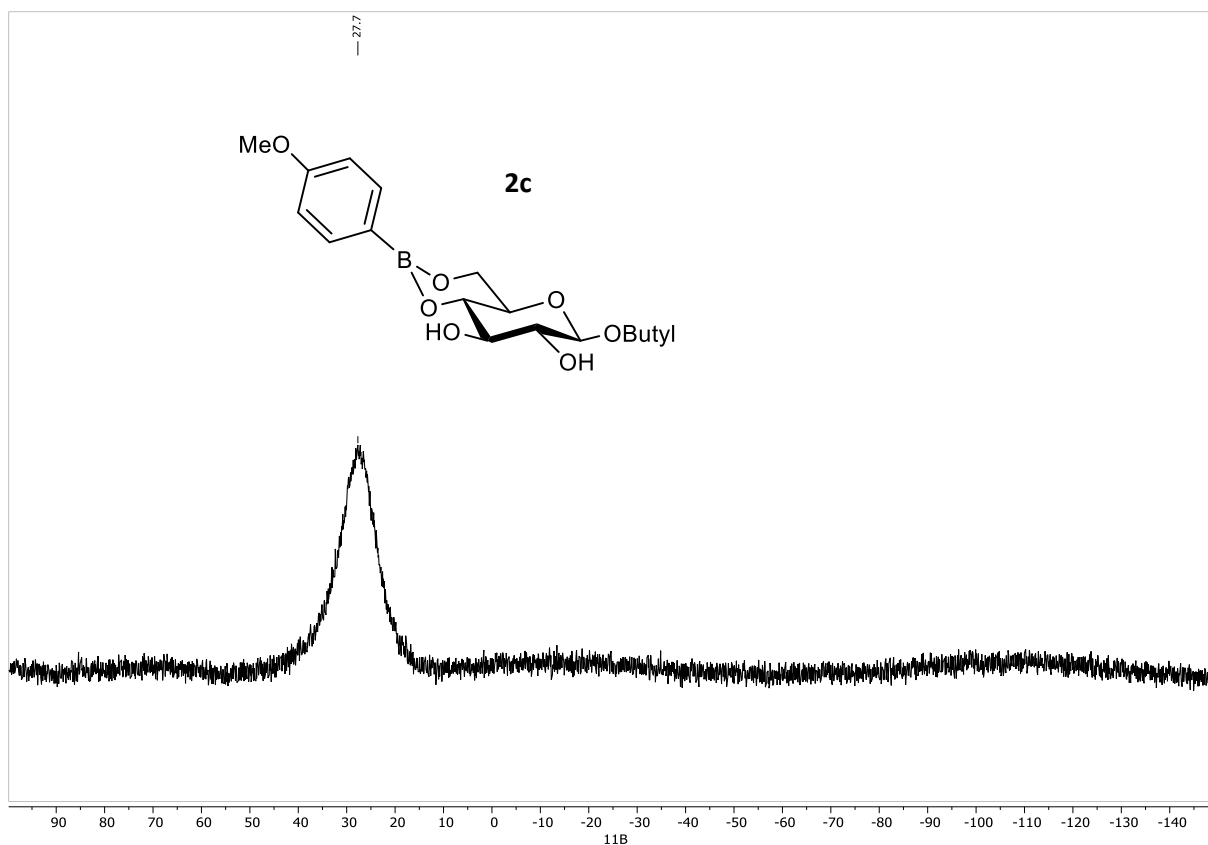

$^{11}\text{B}\{^1\text{H}\}$  NMR ( $\text{CDCl}_3$ , 96 MHz) of compound **2c**

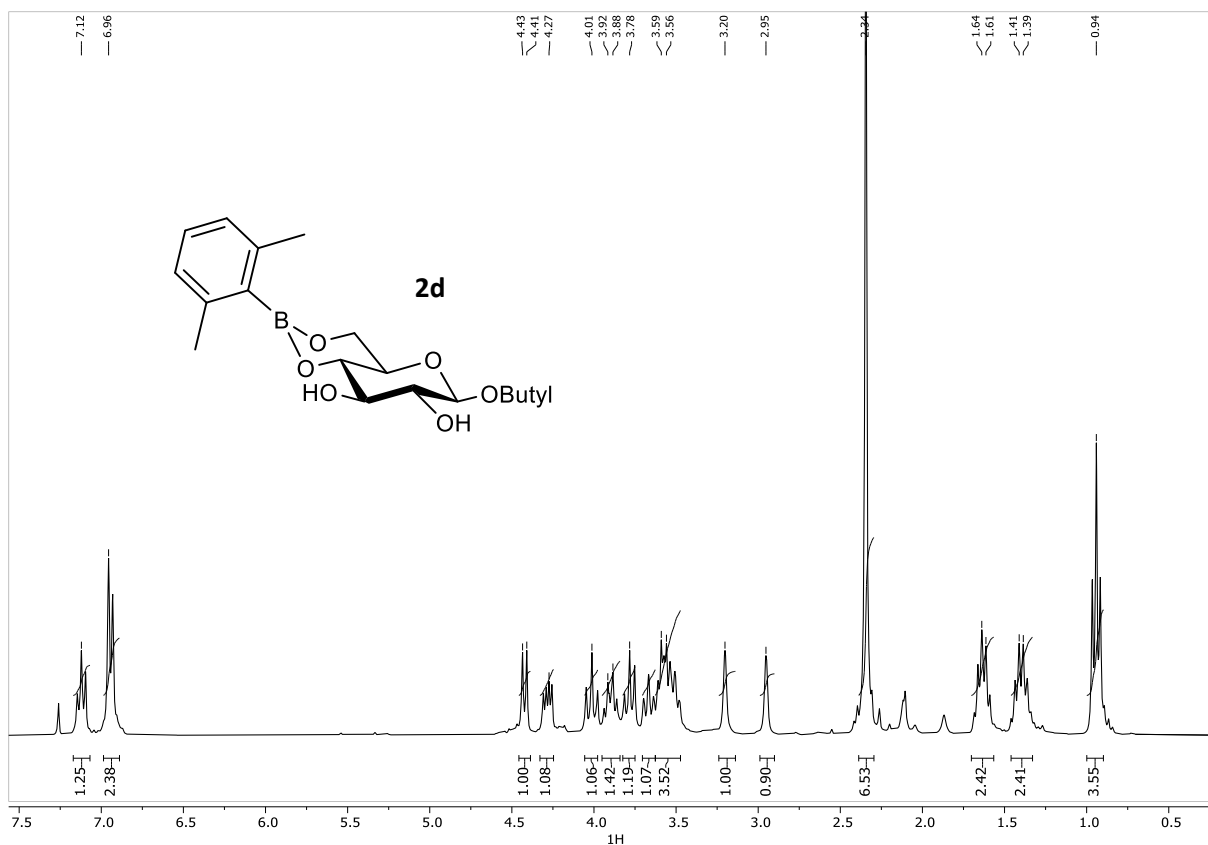

<sup>1</sup>H NMR spectrum (CDCl<sub>3</sub>, 300 MHz) of compound 2d

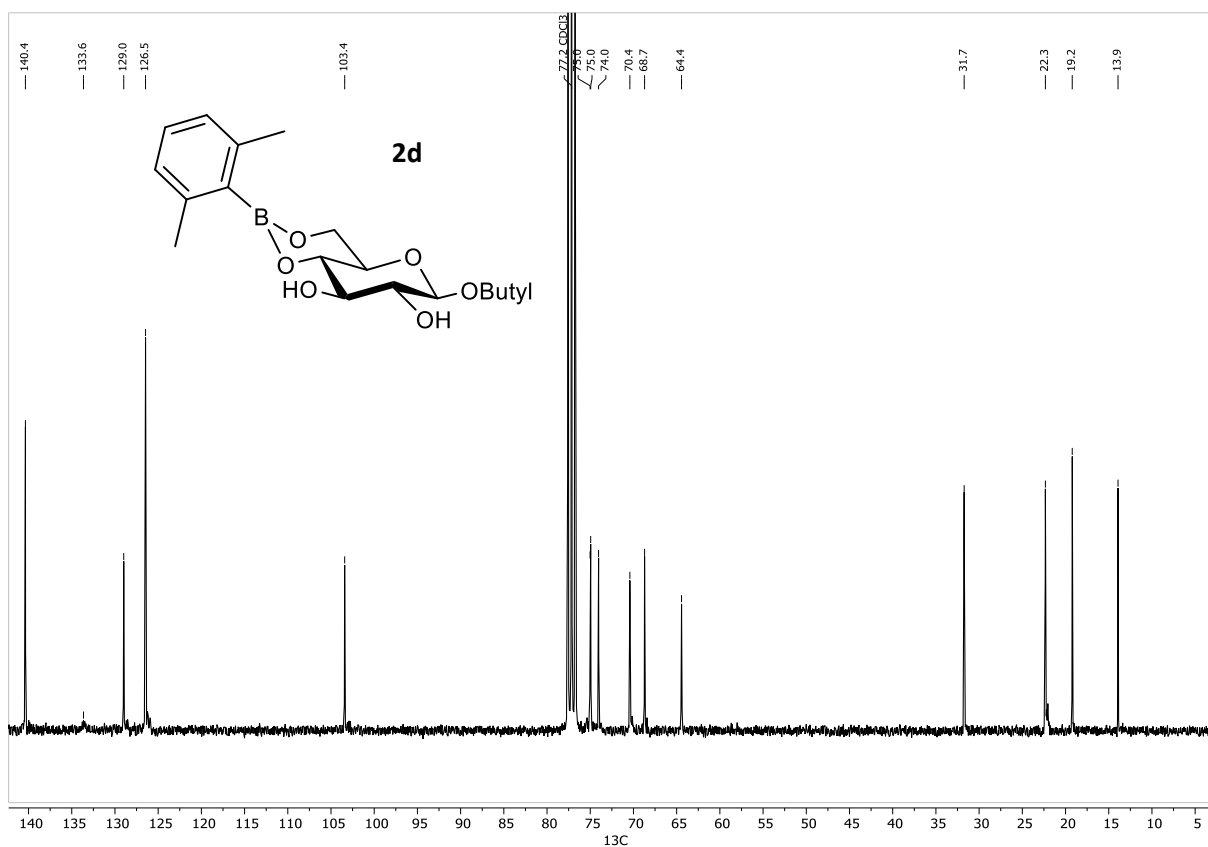

<sup>13</sup>C NMR spectrum (CDCl<sub>3</sub>, 75 MHz) of compound 2d

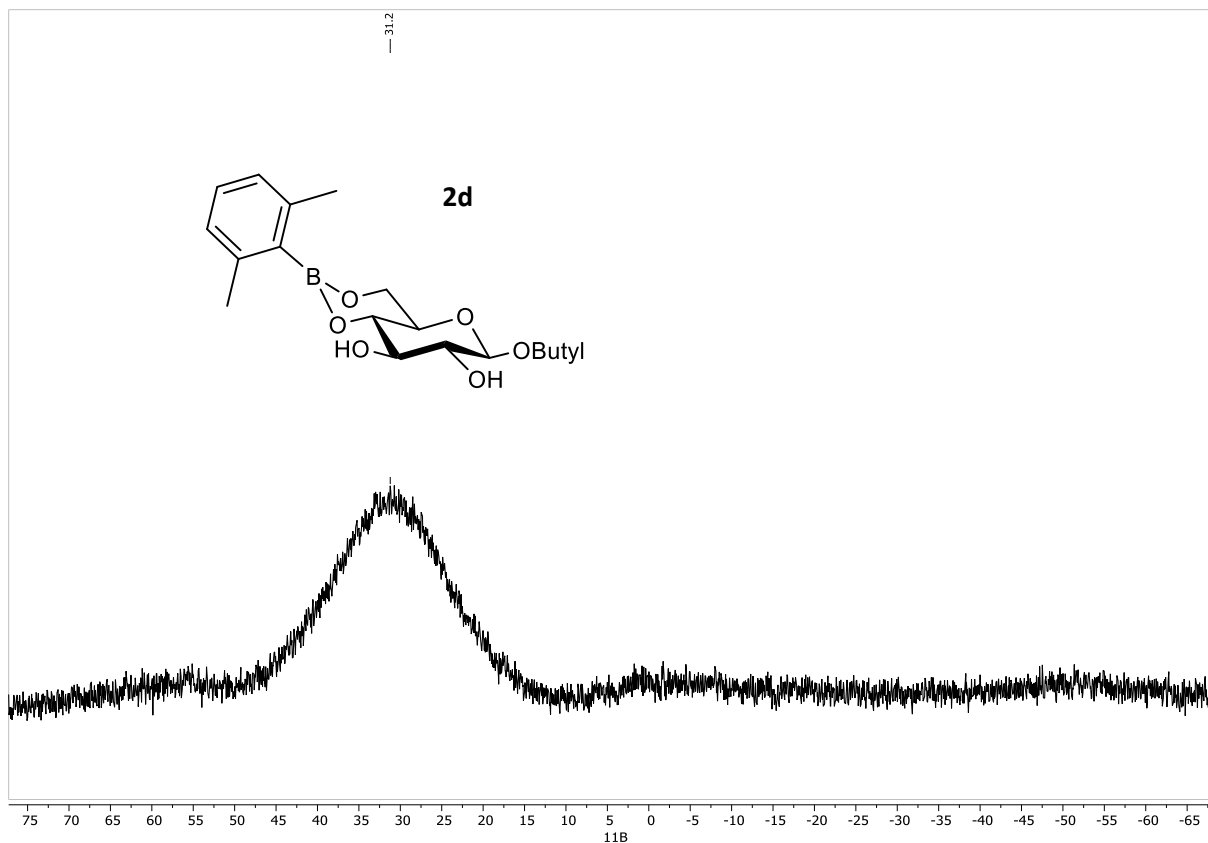

$^{11}\text{B}\{^1\text{H}\}$  NMR ( $\text{CDCl}_3$ , 96 MHz) of compound **2d**

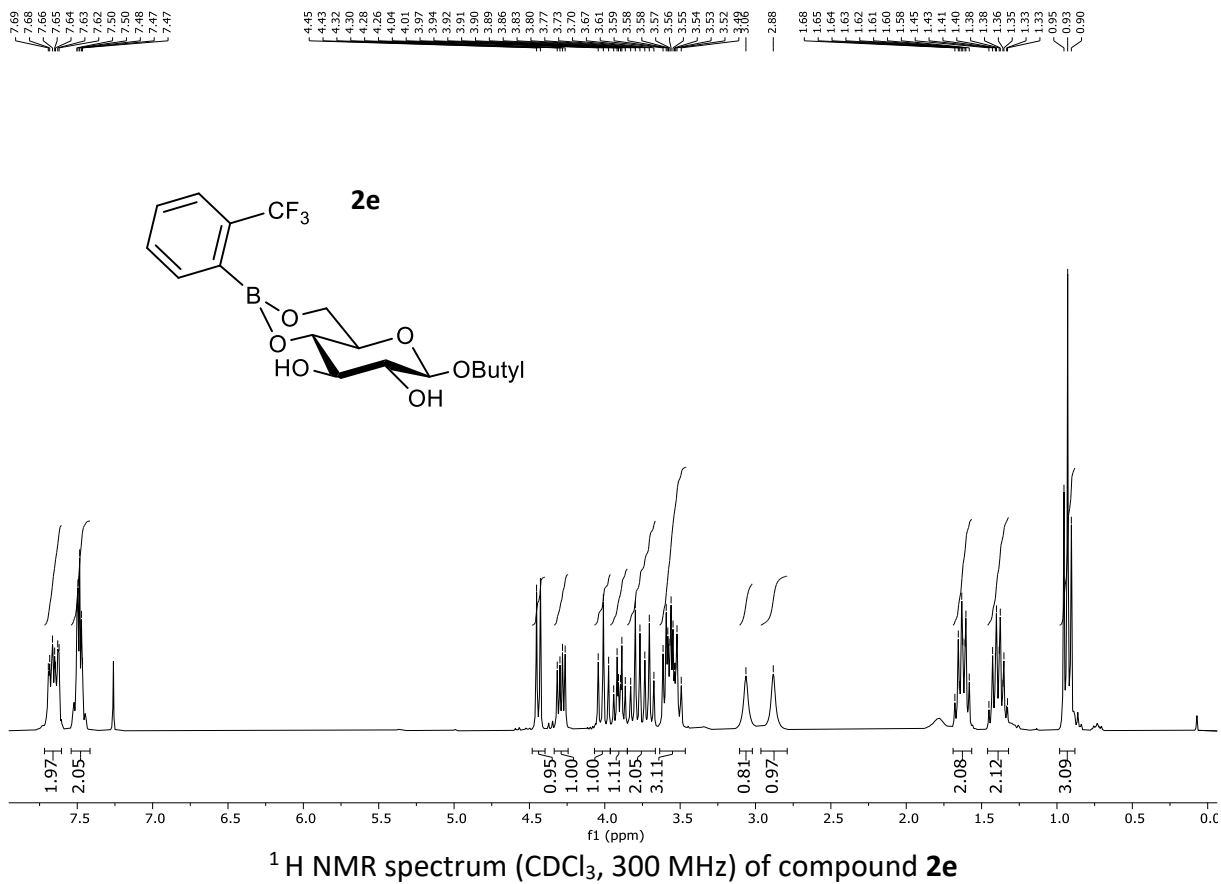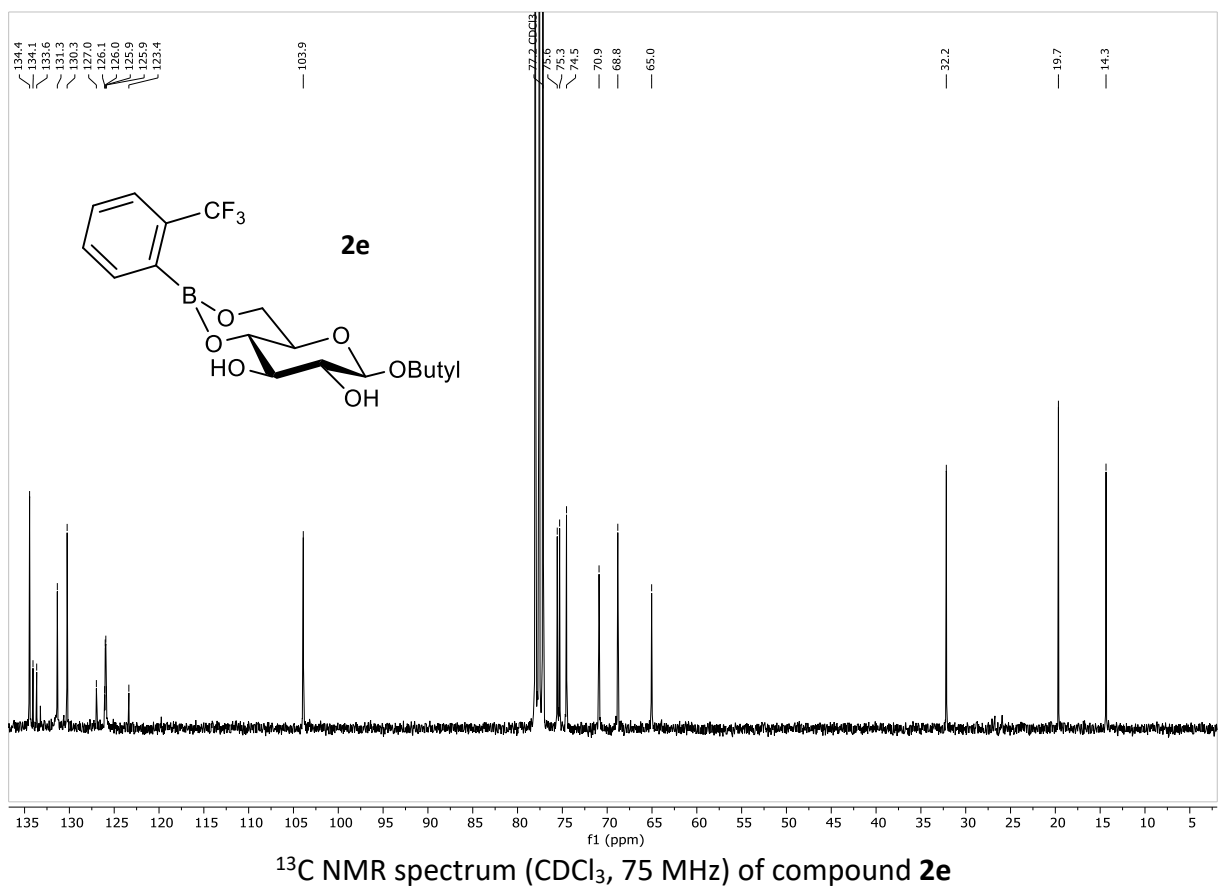



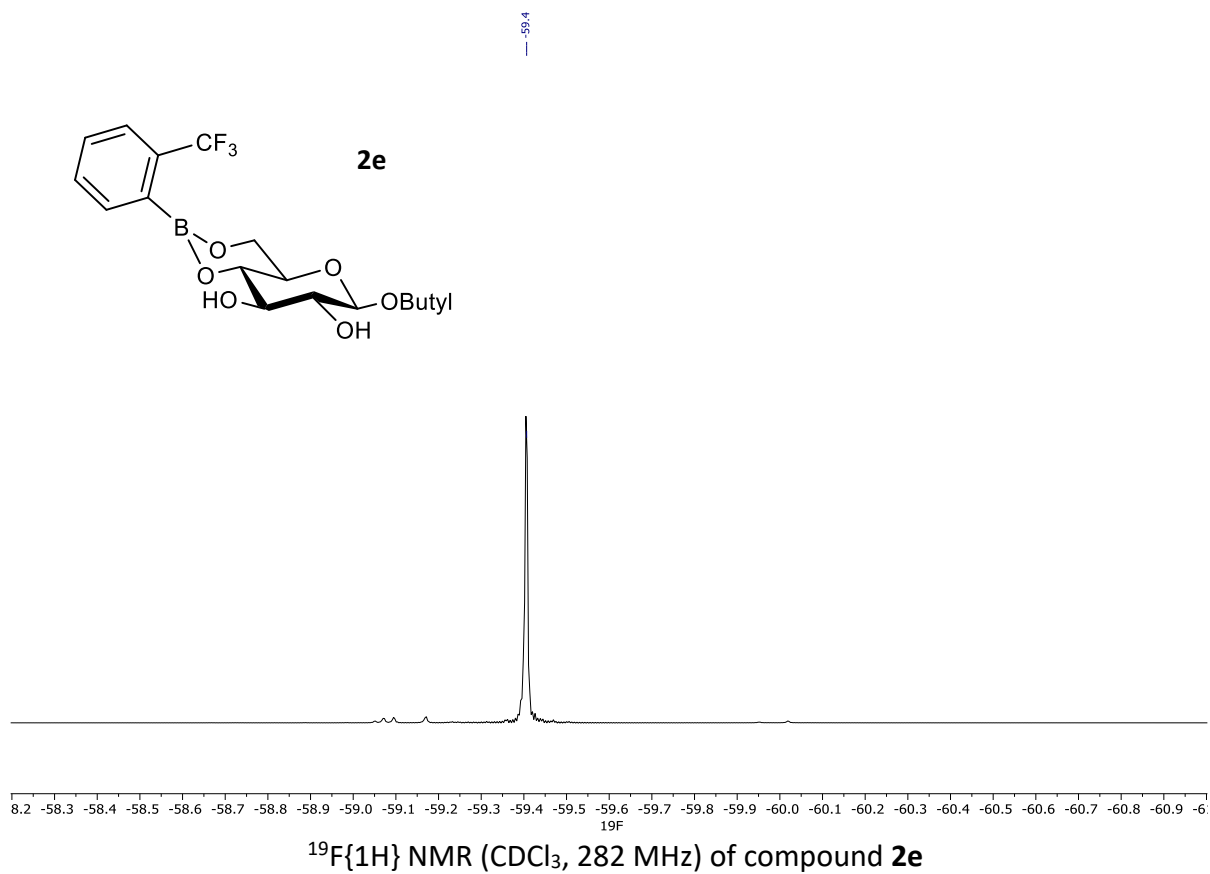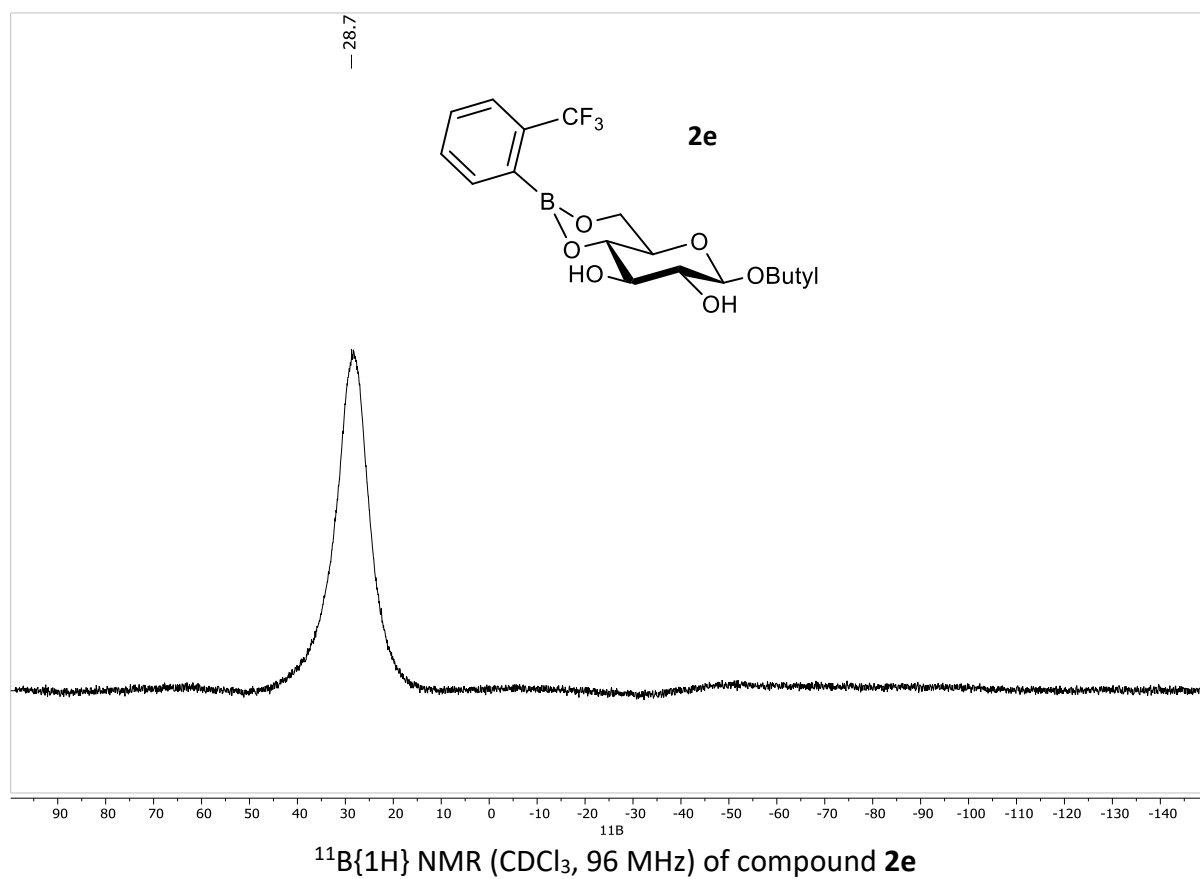

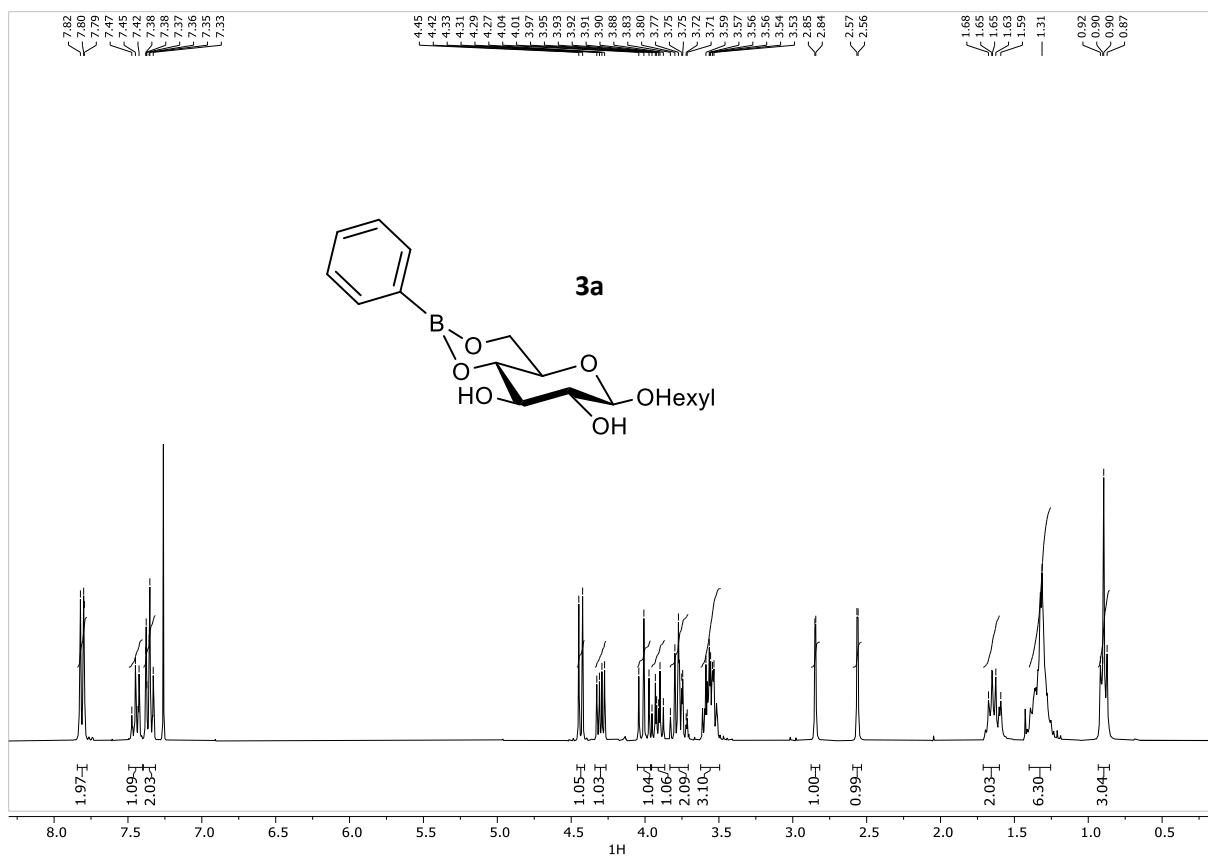

**<sup>1</sup>H NMR spectrum (CDCl<sub>3</sub>, 300 MHz) of compound 3a**

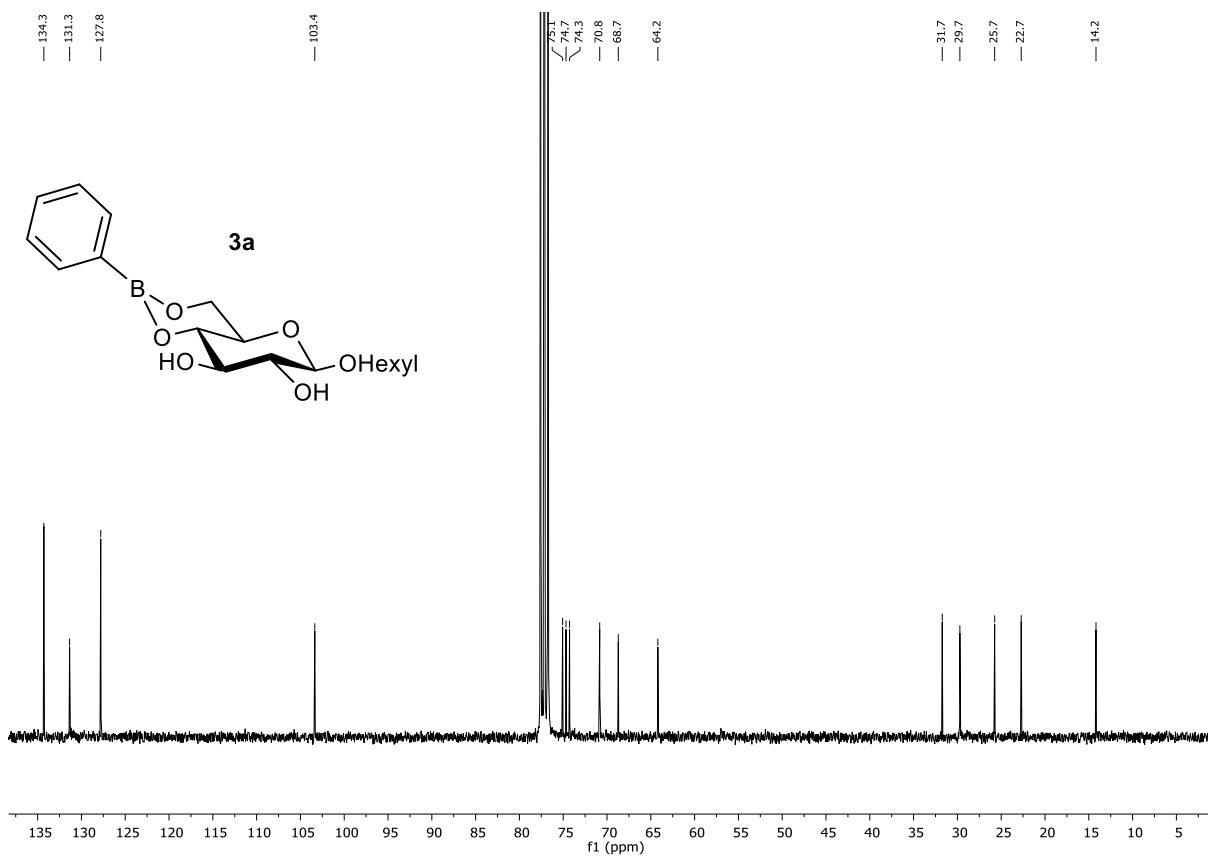

**<sup>13</sup>C NMR spectrum (CDCl<sub>3</sub>, 75 MHz) of compound 3a**

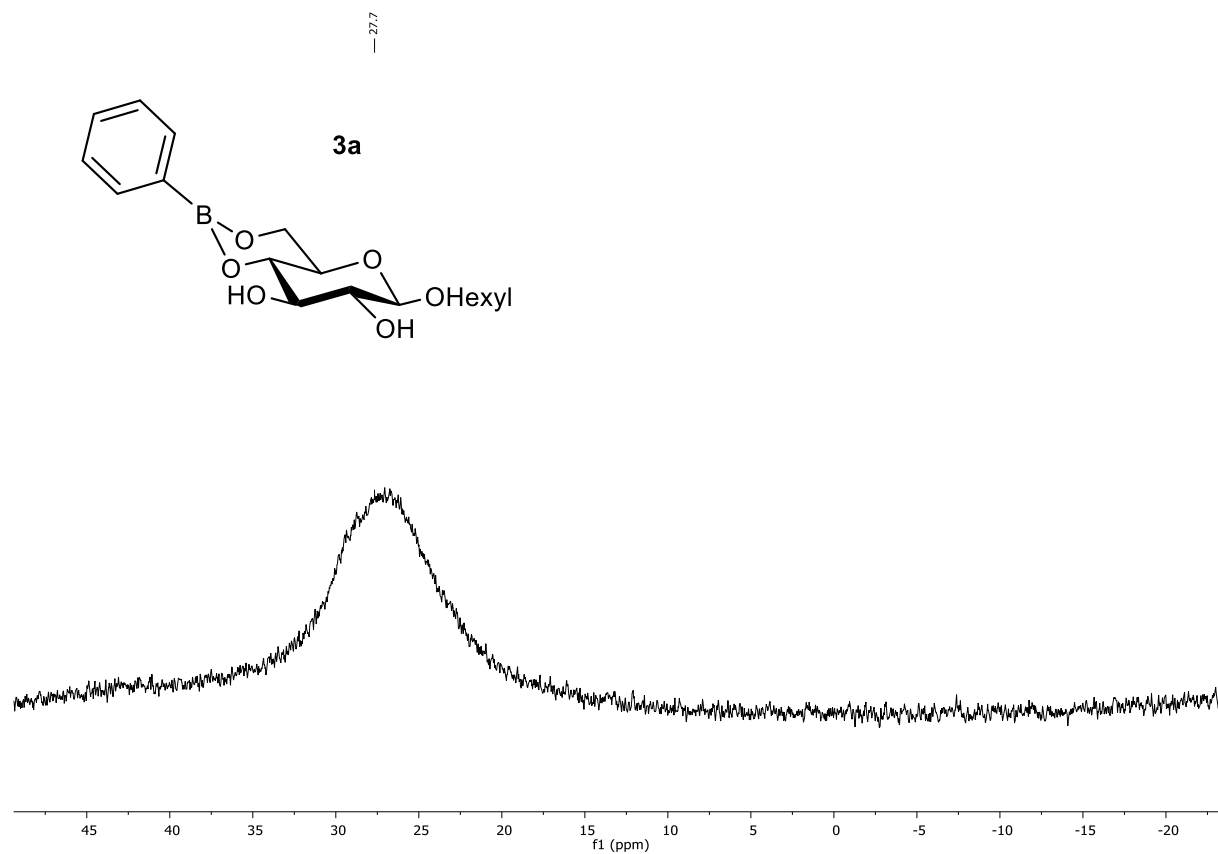

$^{11}\text{B}\{^1\text{H}\}$  NMR ( $\text{CDCl}_3$ , 96 MHz) of compound **3a**

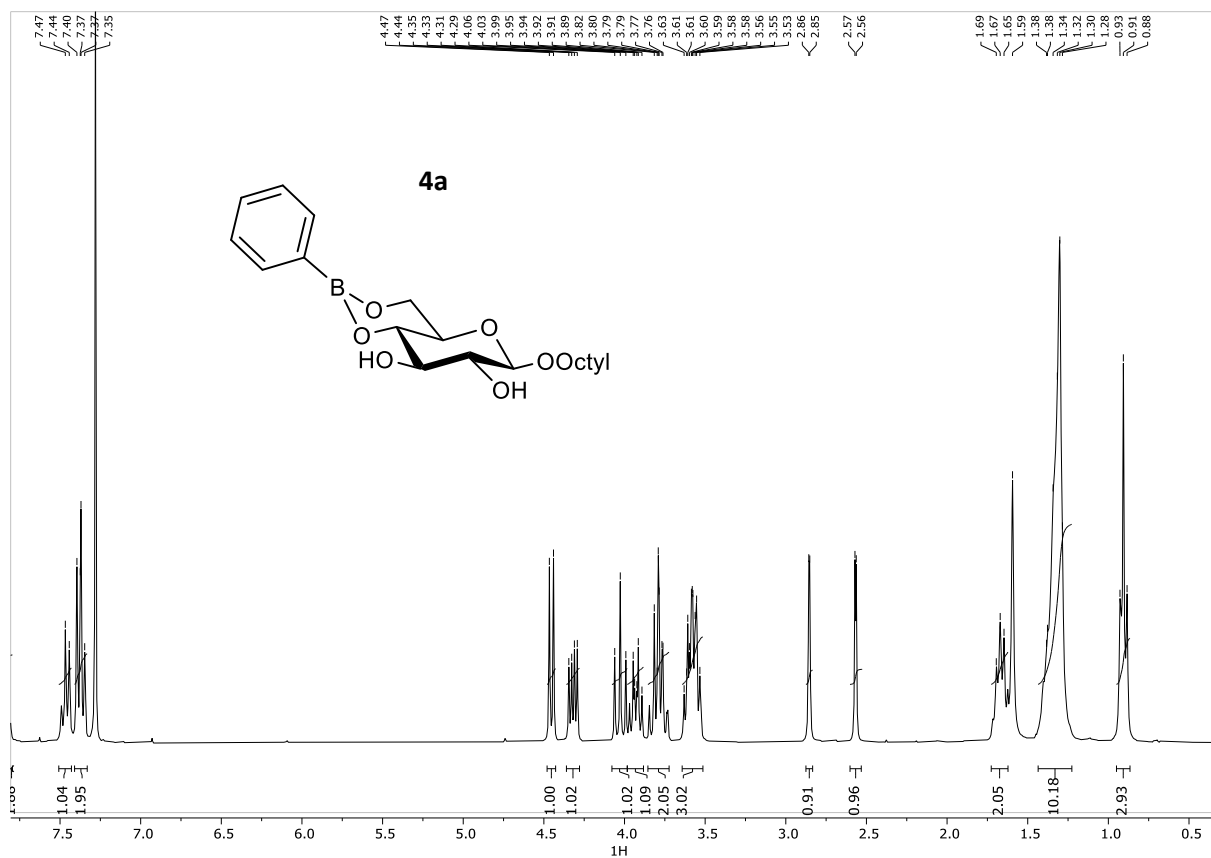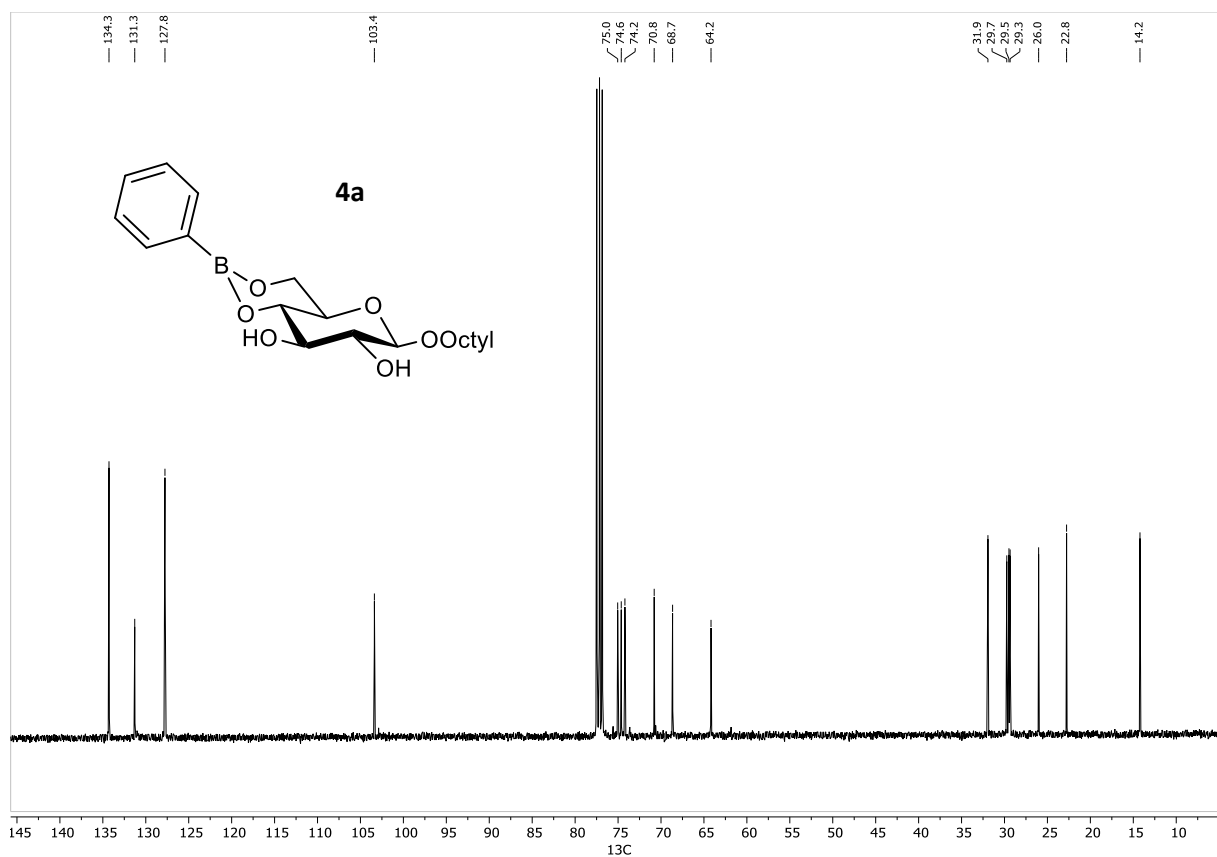

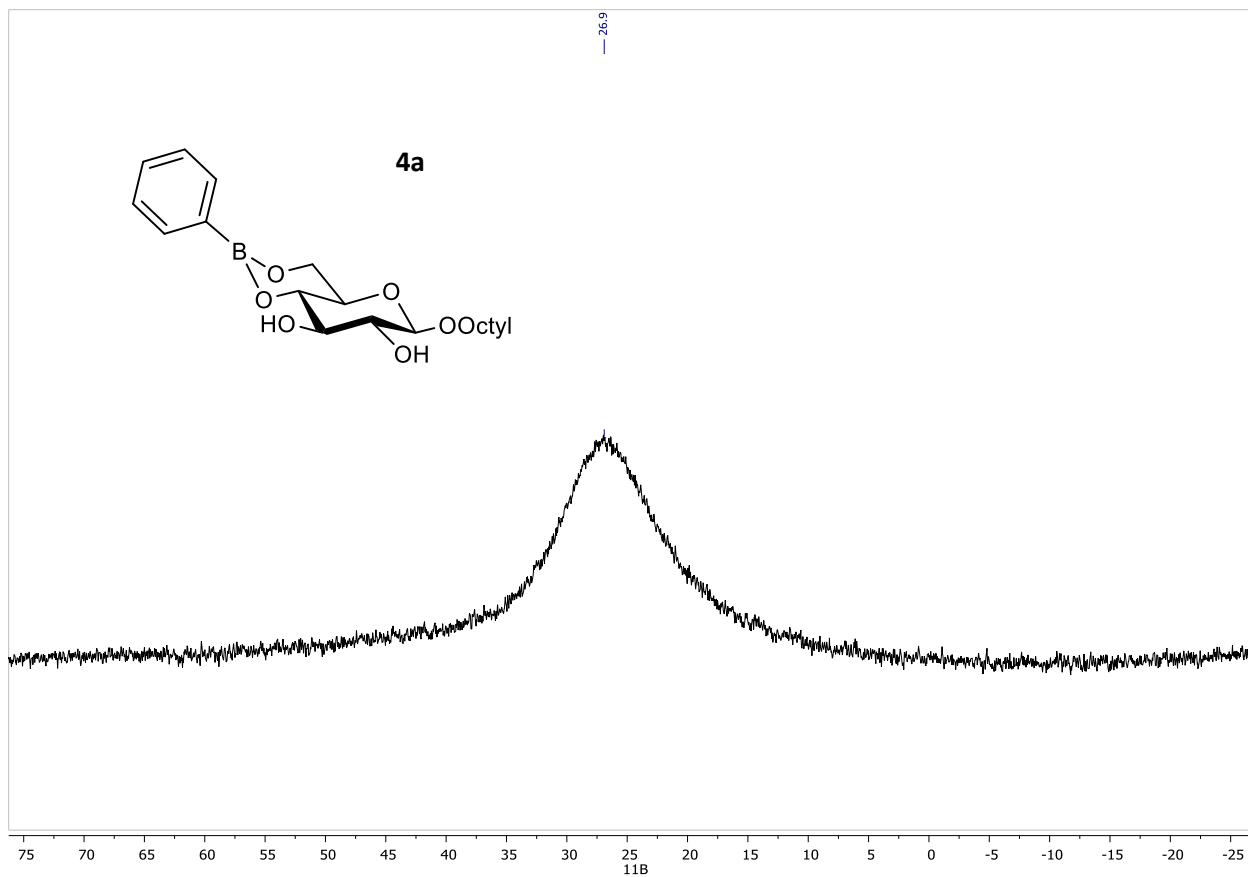

$^{11}\text{B}\{^1\text{H}\}$  NMR (CDCl<sub>3</sub>, 96 MHz) of compound **4a**

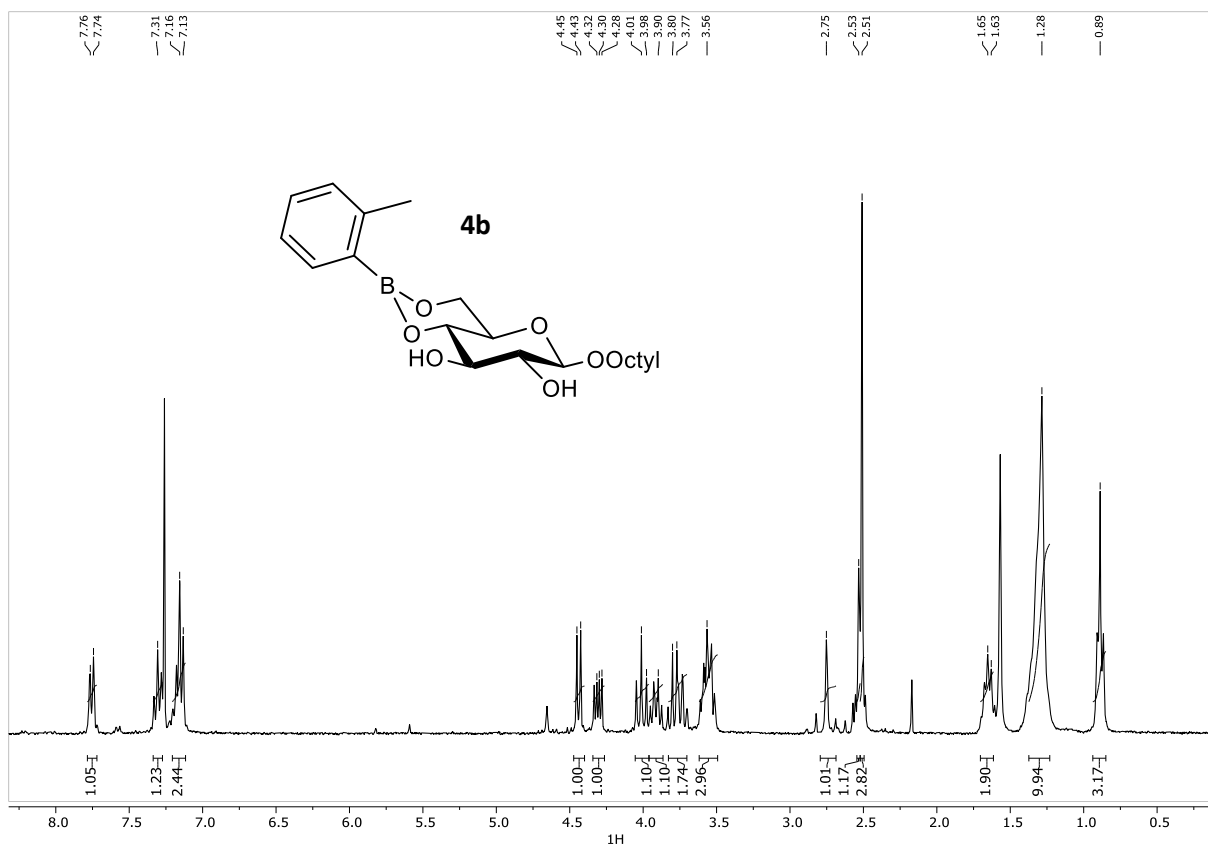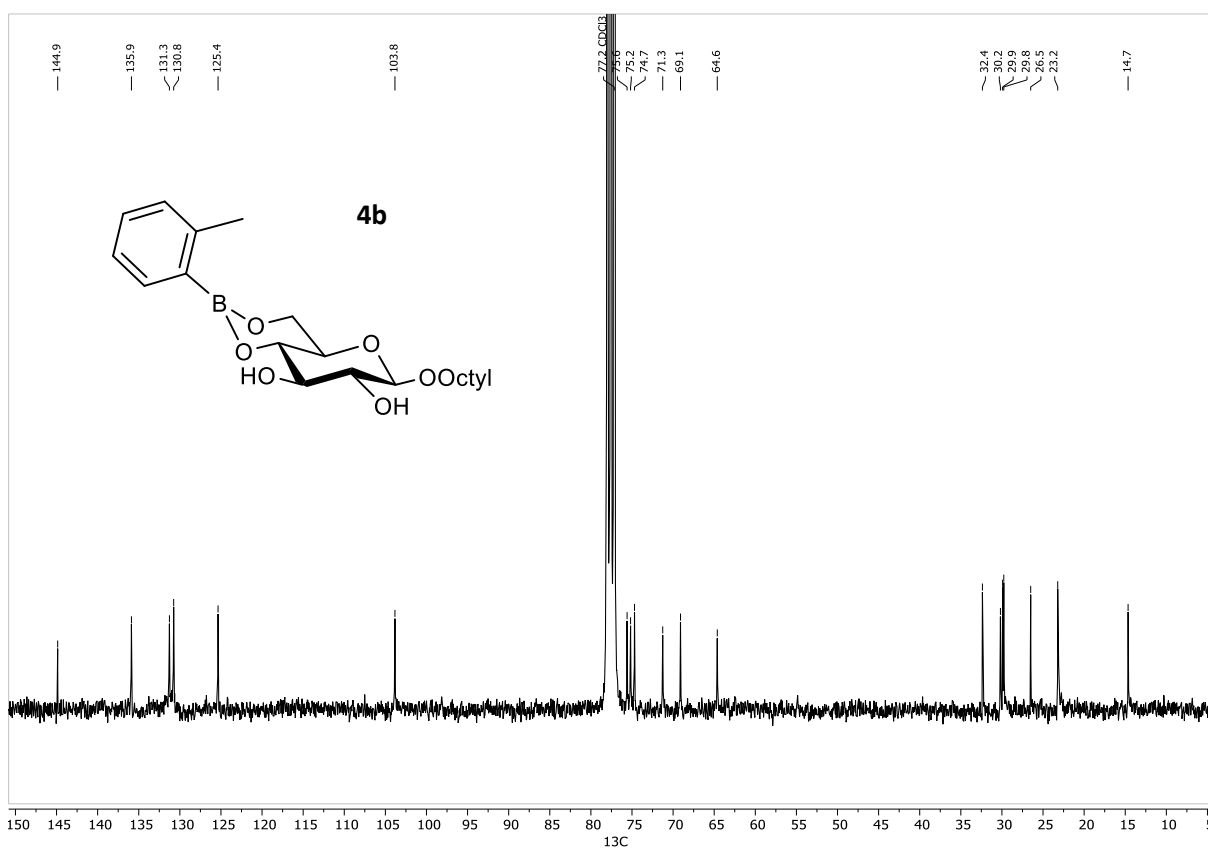

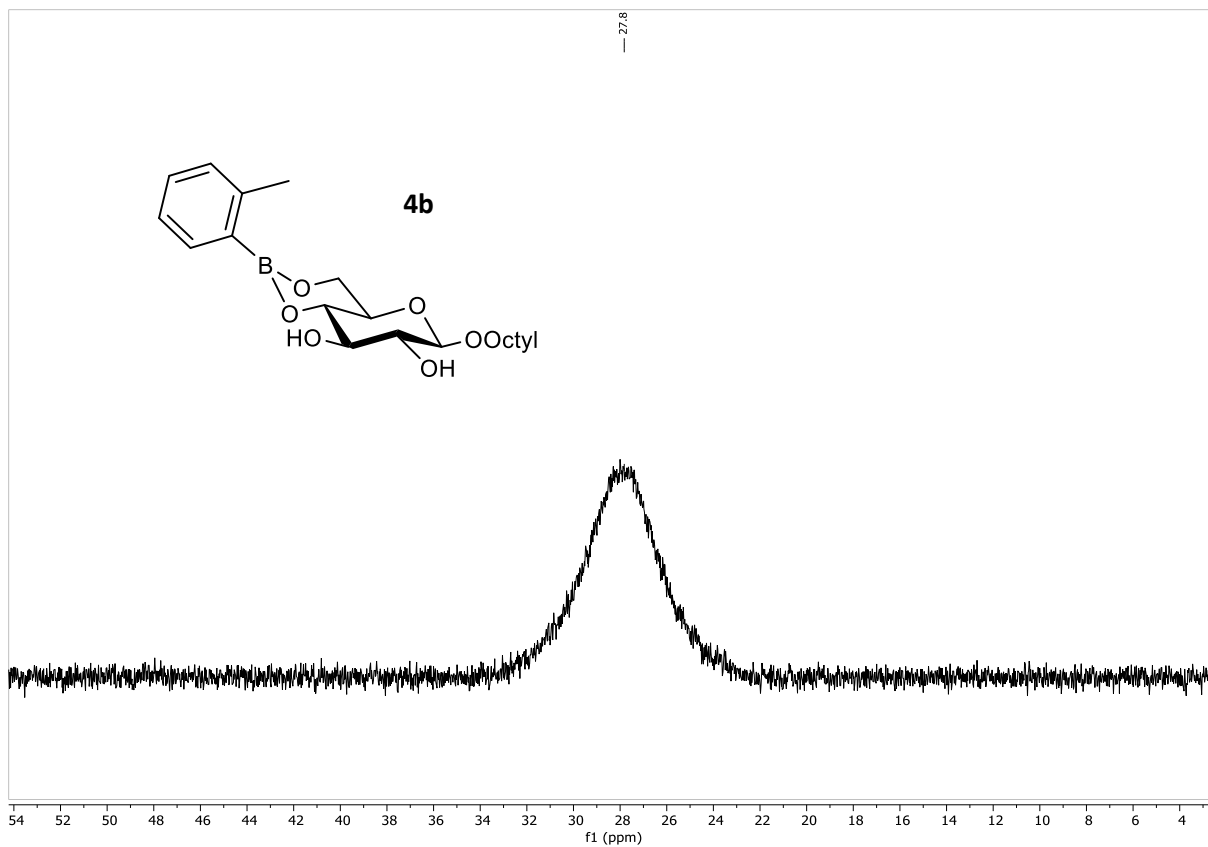

$^{11}\text{B}\{^1\text{H}\}$  NMR ( $\text{CDCl}_3$ , 96 MHz) of compound **4b**

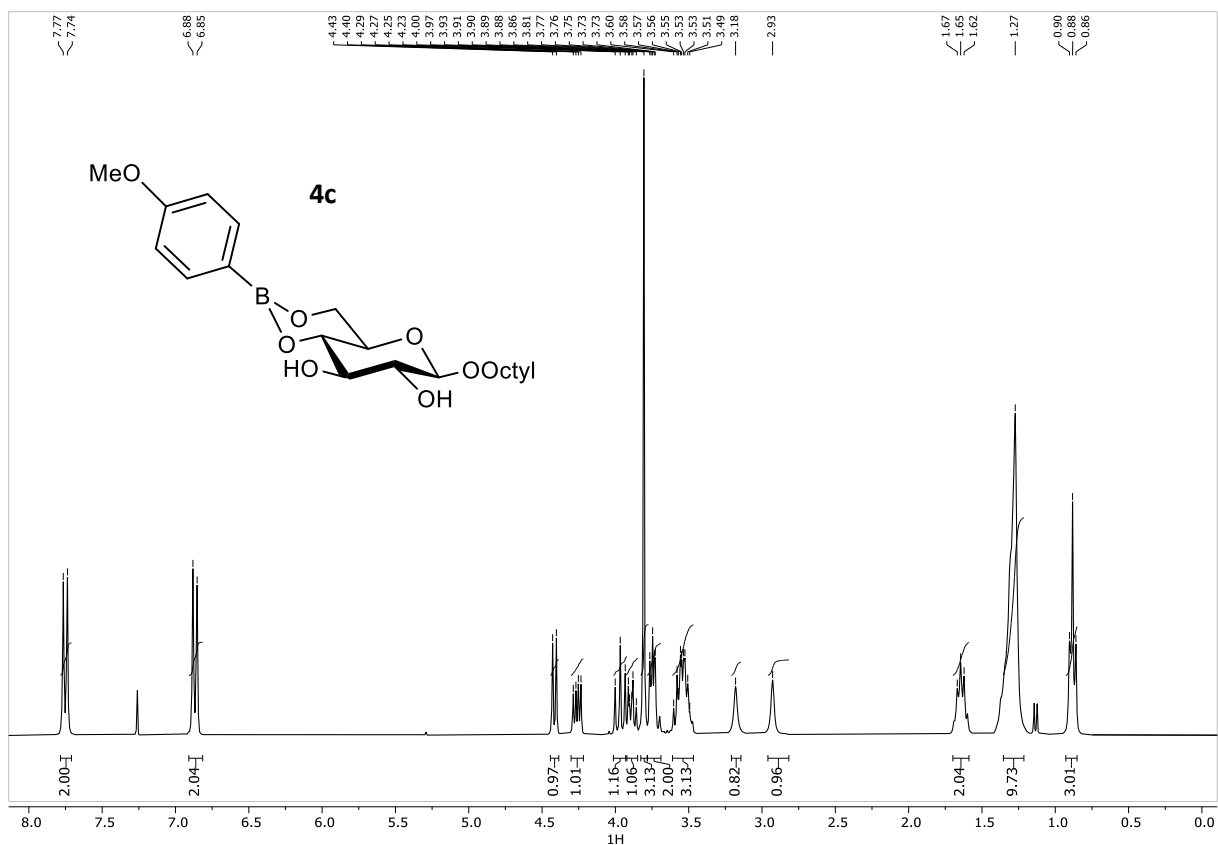

<sup>1</sup>H NMR spectrum (CDCl<sub>3</sub>, 300 MHz) of compound **4c**

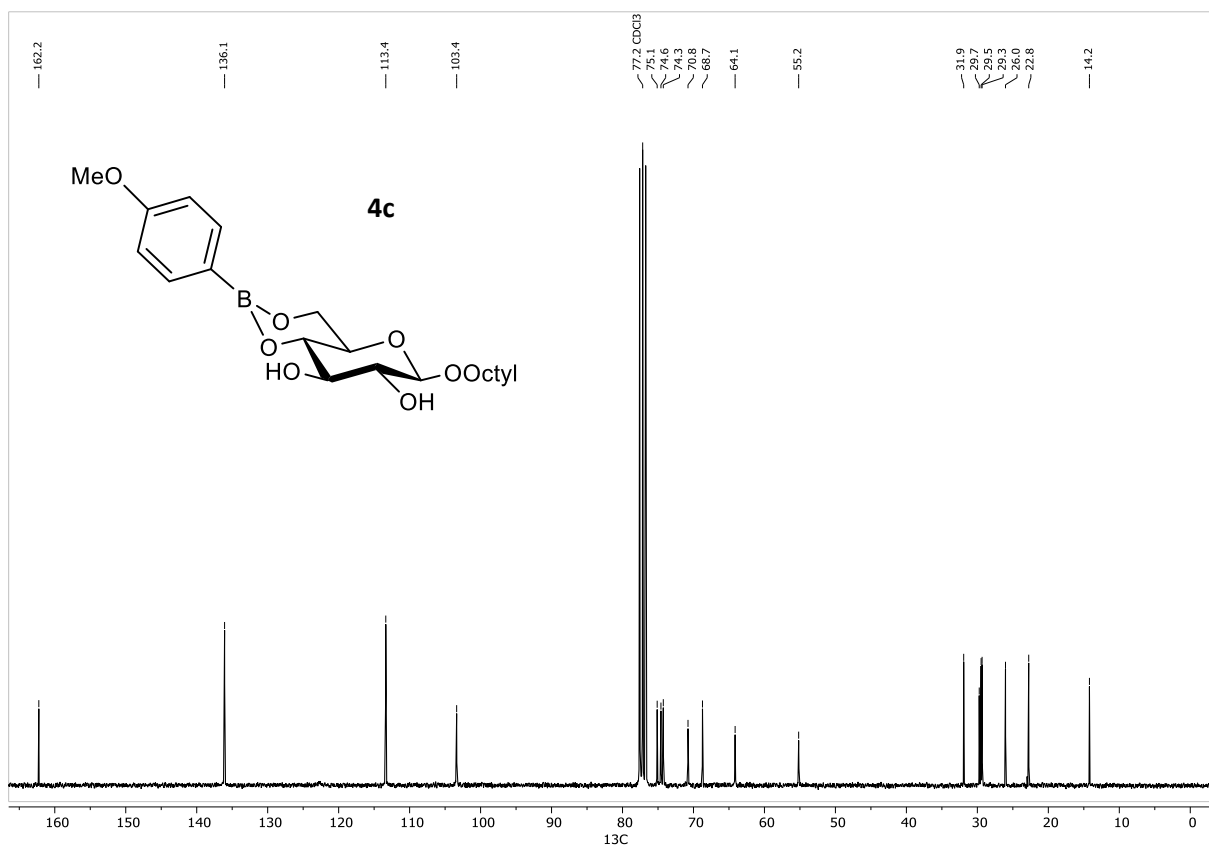

<sup>13</sup>C NMR spectrum (CDCl<sub>3</sub>, 75 MHz) of compound **4c**



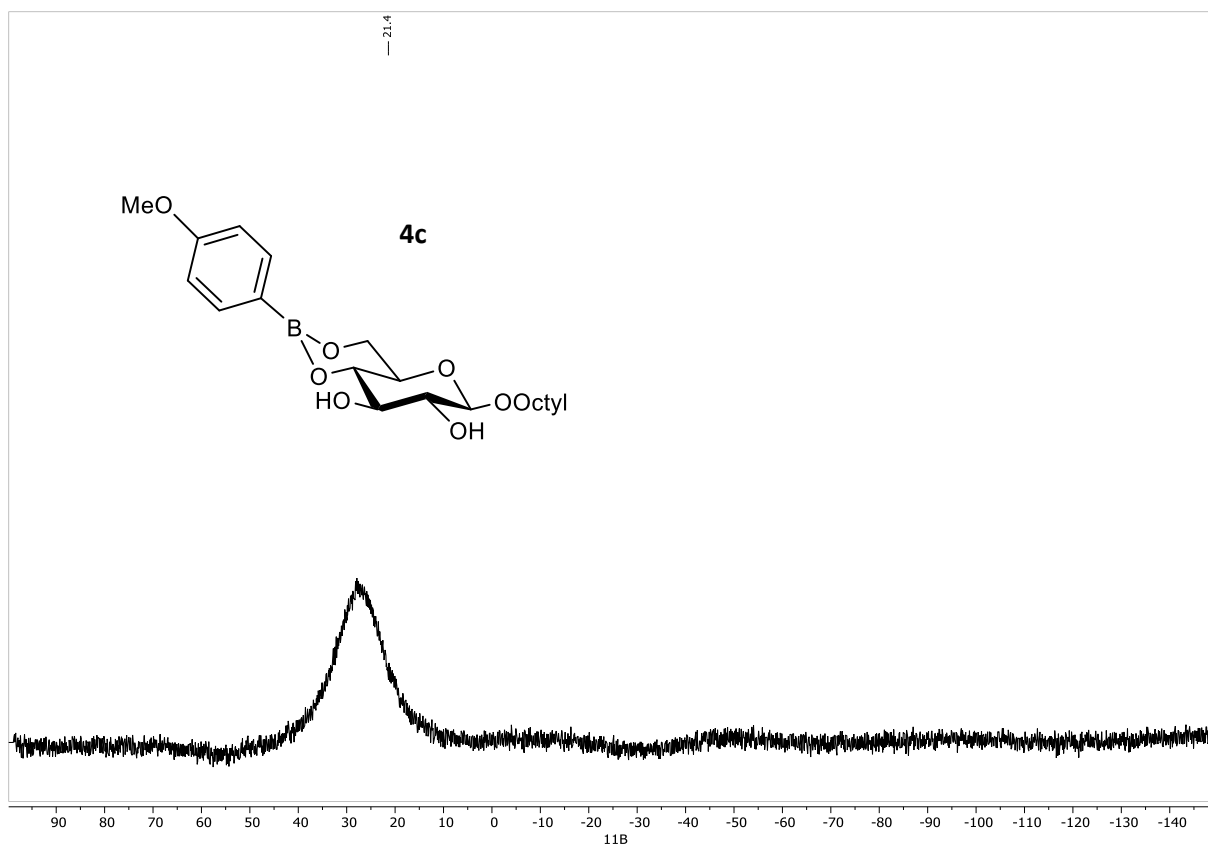

$^{11}\text{B}\{^1\text{H}\}$  NMR ( $\text{CDCl}_3$ , 96 MHz) of compound **4c**

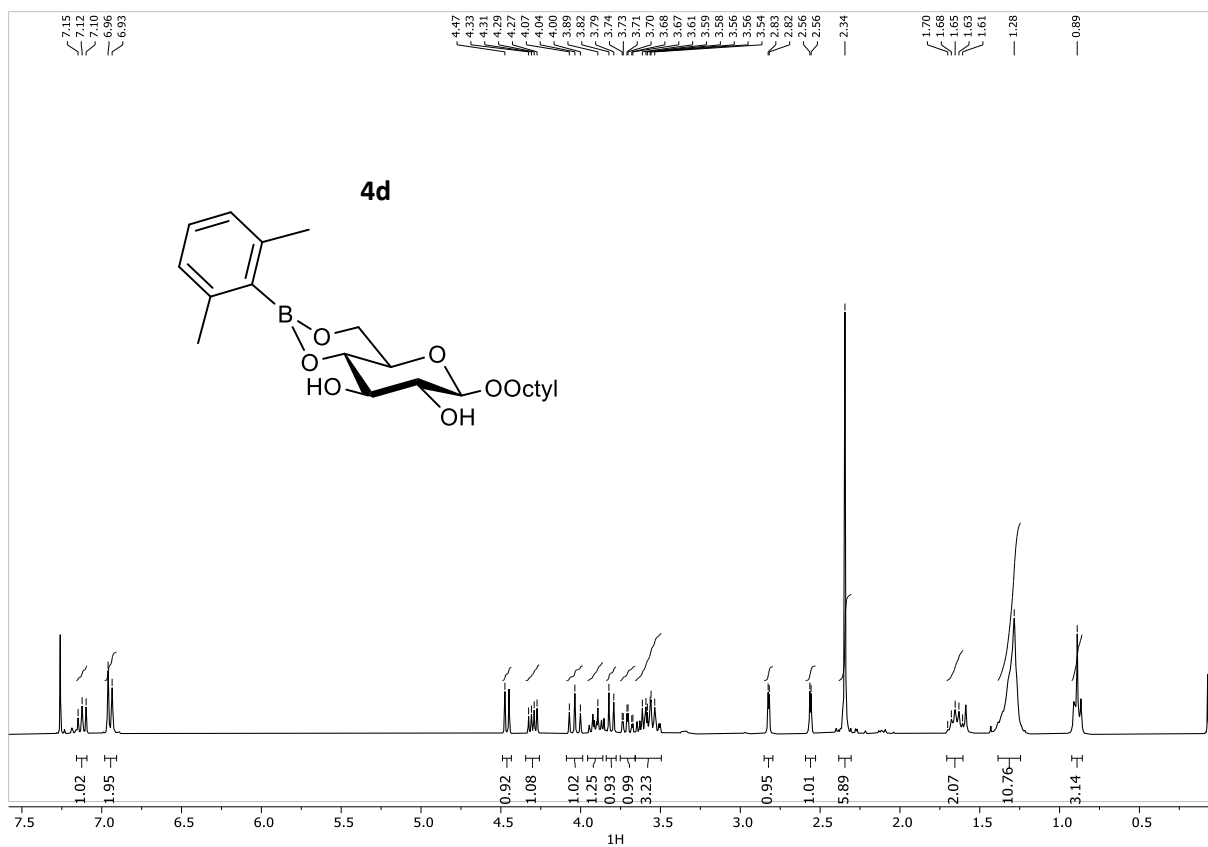

<sup>1</sup>H NMR spectrum (CDCl<sub>3</sub>, 300 MHz) of compound **4d**

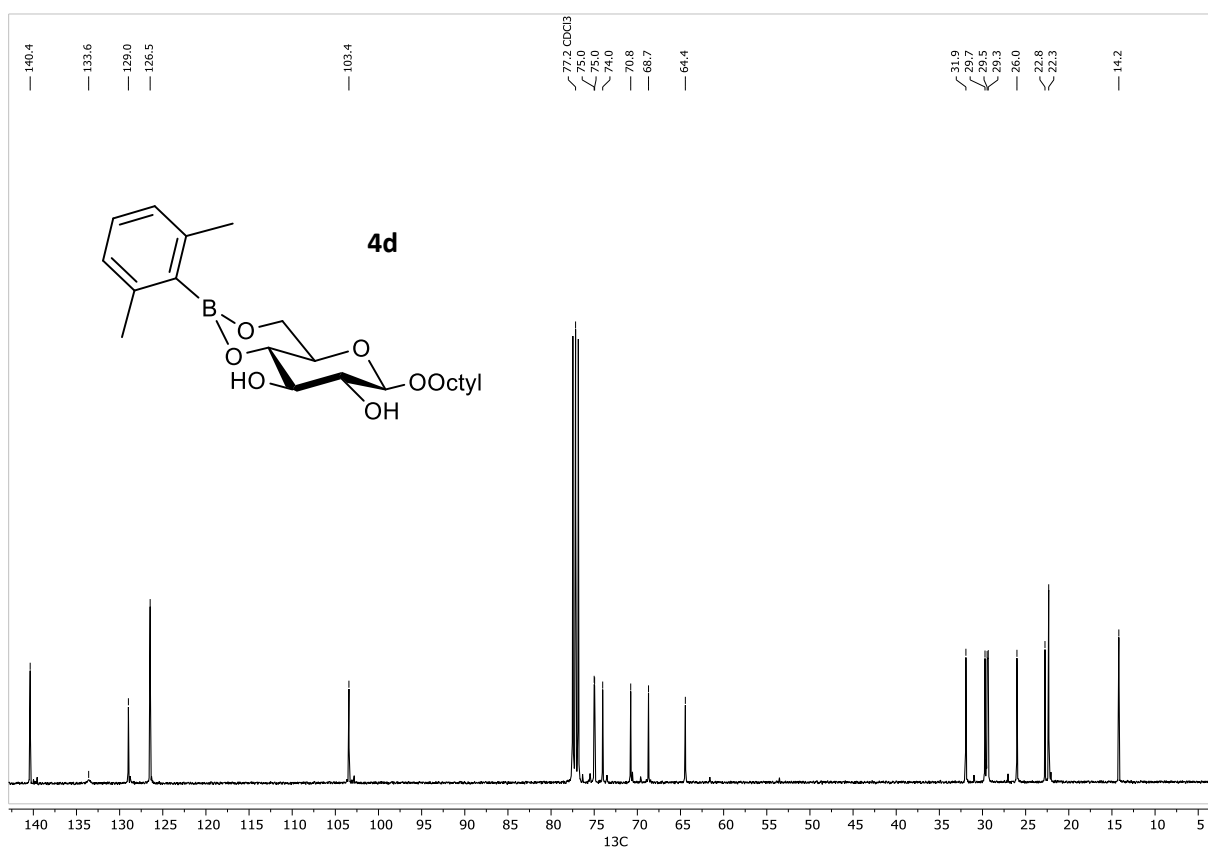

<sup>13</sup>C NMR spectrum (CDCl<sub>3</sub>, 101 MHz) of compound **4d**

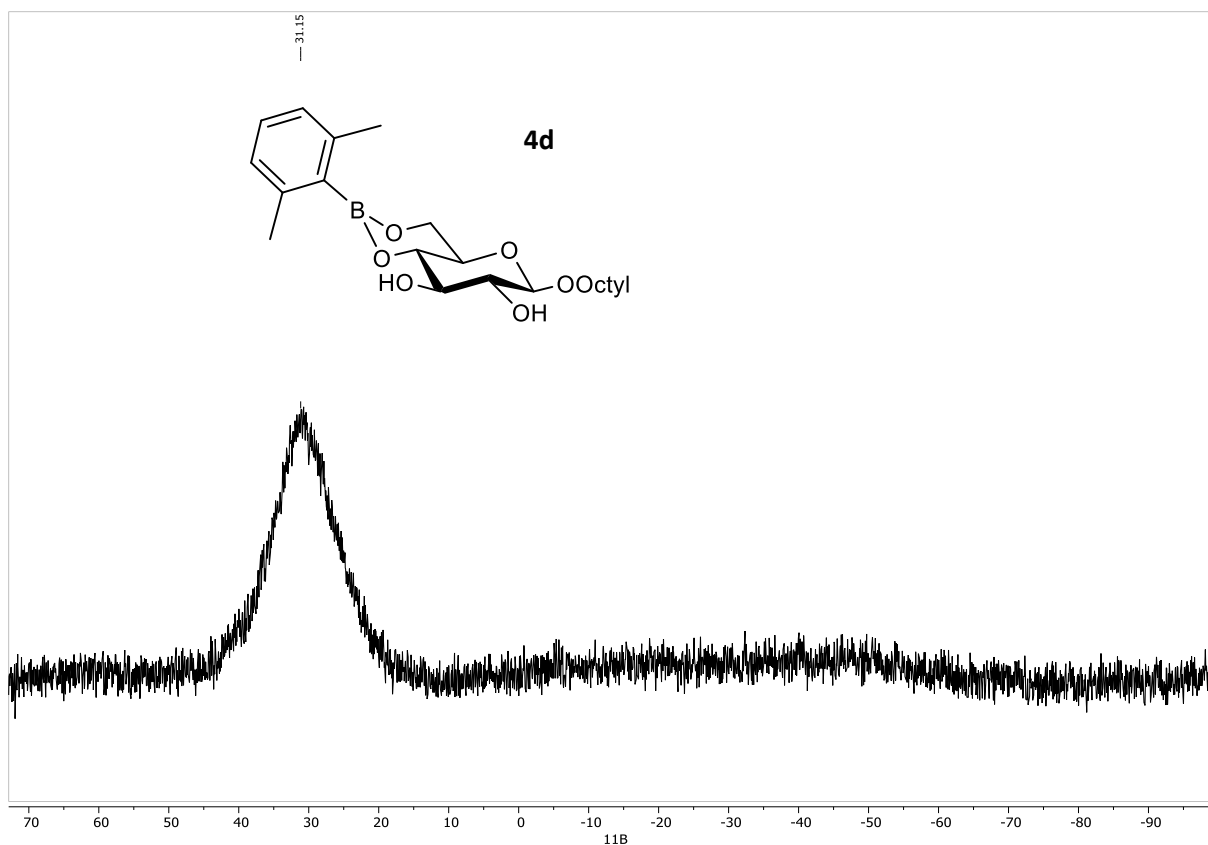

$^{11}\text{B}\{1\text{H}\}$  NMR ( $\text{CDCl}_3$ , 96 MHz) of compound **4d**

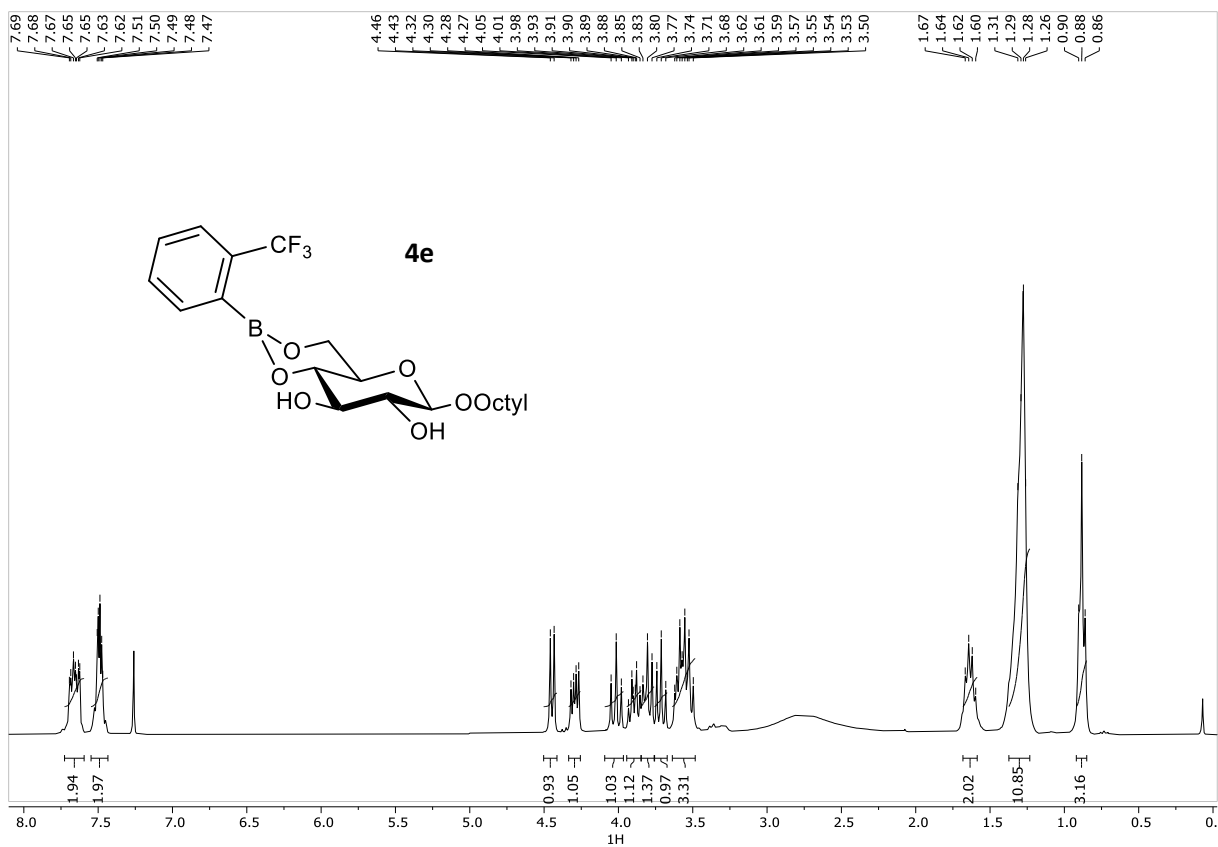

<sup>1</sup>H NMR spectrum (CDCl<sub>3</sub>, 300 MHz) of compound **4e**

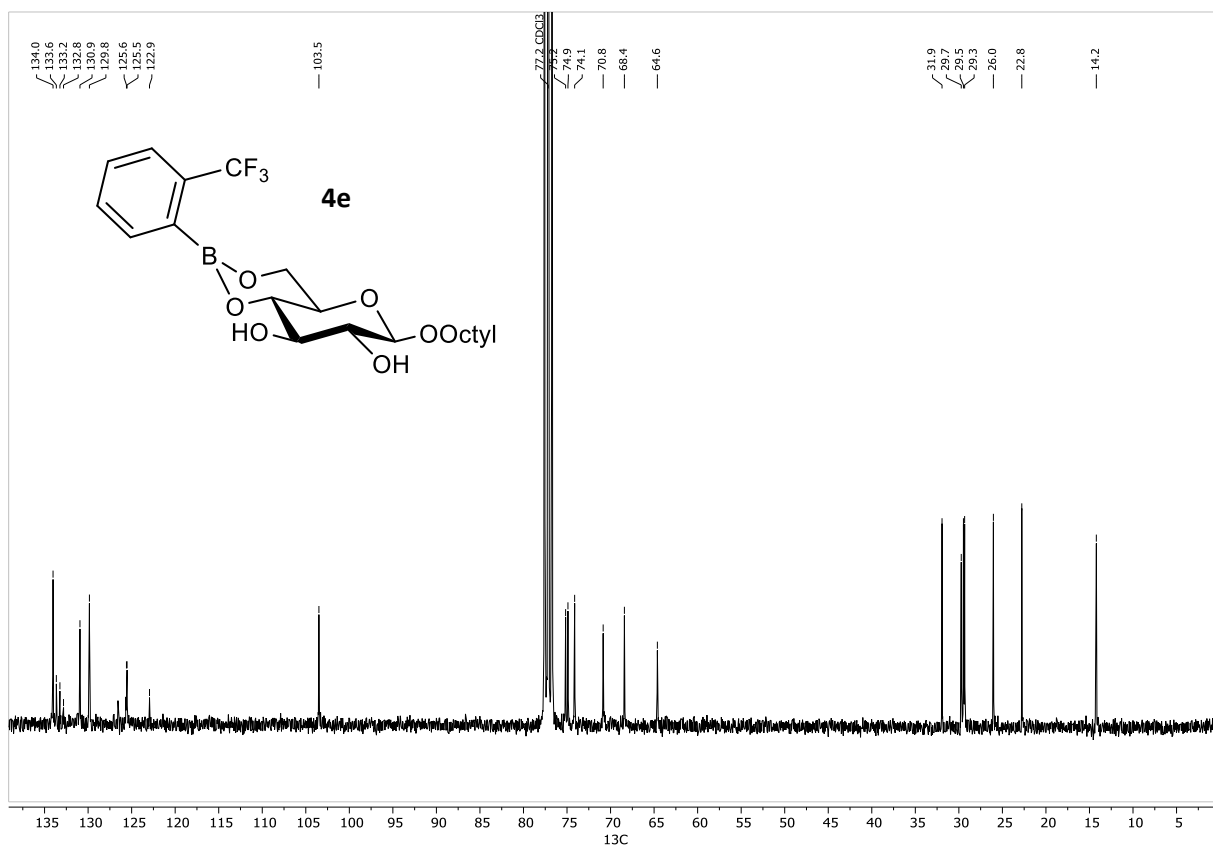

<sup>13</sup>C NMR spectrum (CDCl<sub>3</sub>, 75 MHz) of compound **4e**

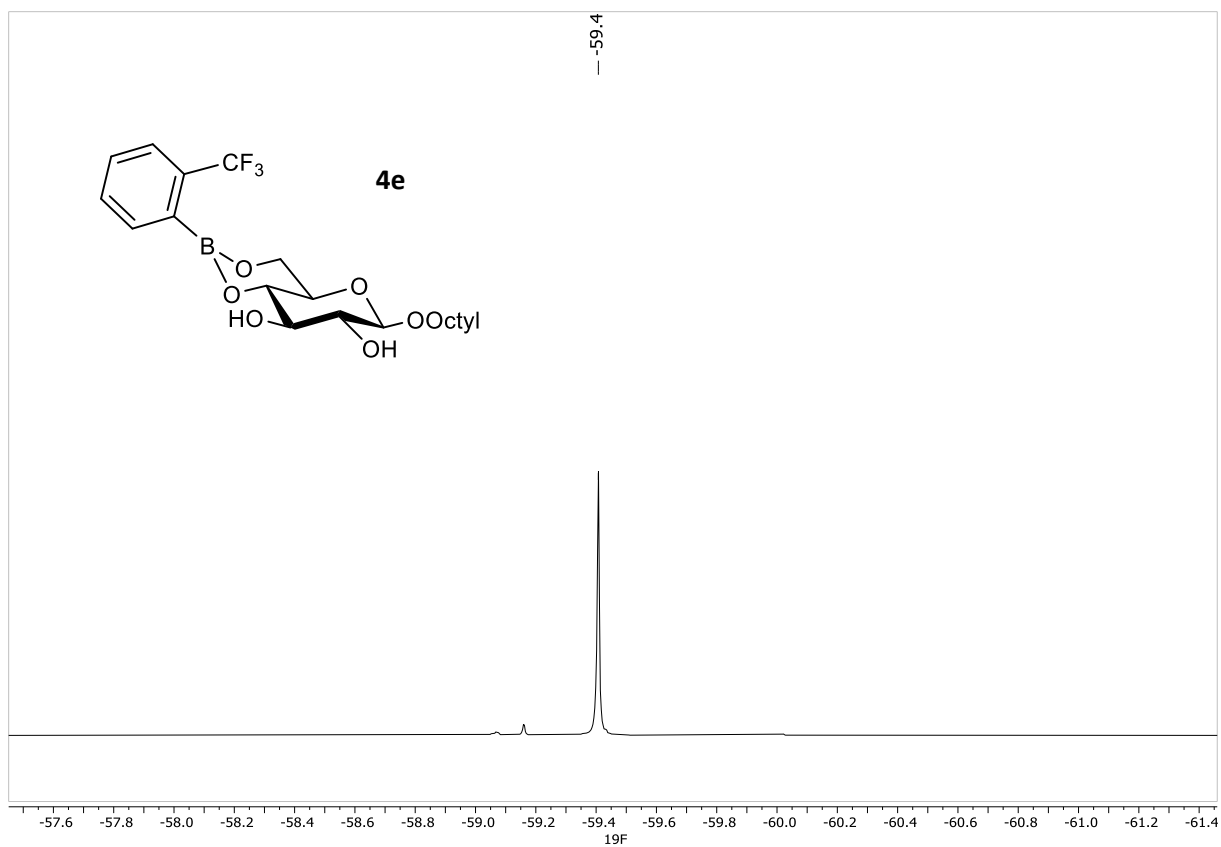

$^{19}\text{F}\{^1\text{H}\}$  NMR ( $\text{CDCl}_3$ , 282 MHz) of compound **4e**

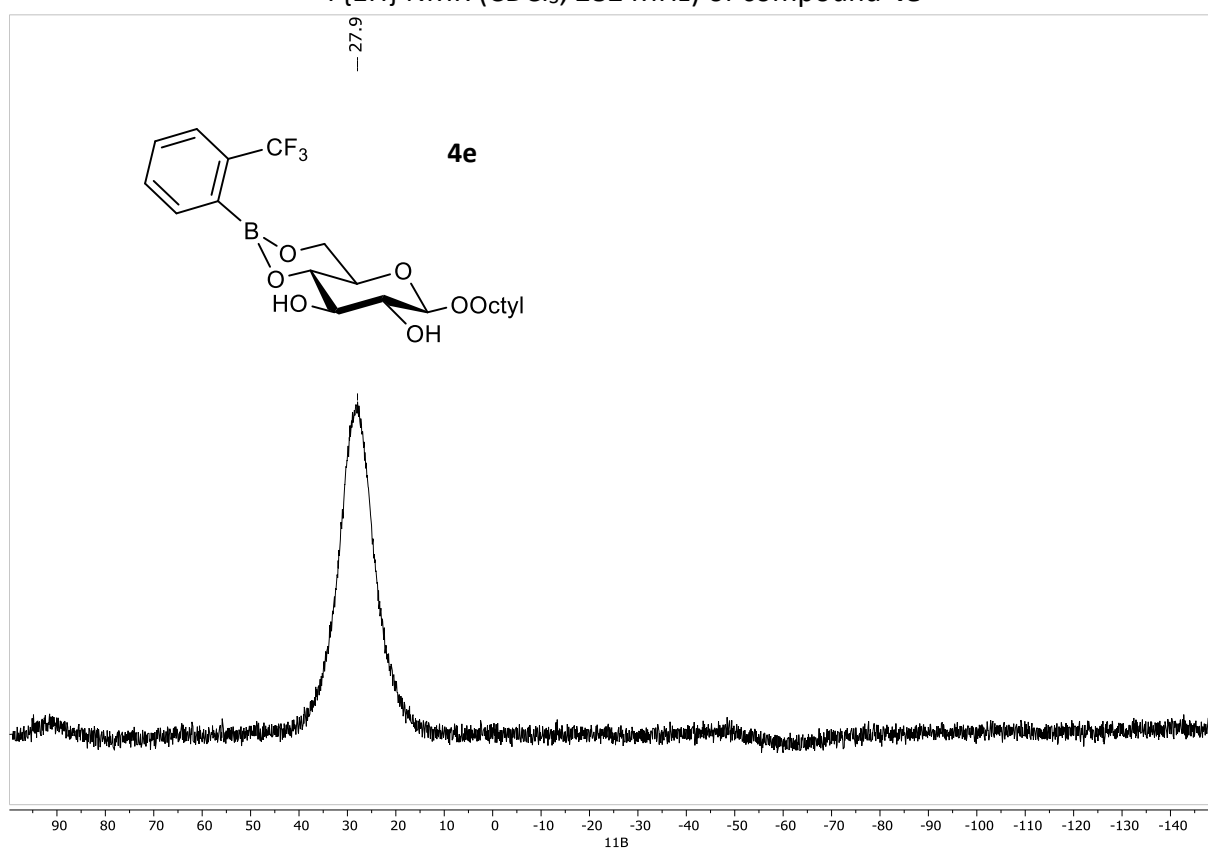

$^{11}\text{B}\{^1\text{H}\}$  NMR ( $\text{CDCl}_3$ , 96 MHz) of compound **4e**

## S2. Rheometry of gels in cyclohexane and ethyl myristate

Frequency dependent experiment with gel in toluene with **4a** at a strain of 5%.

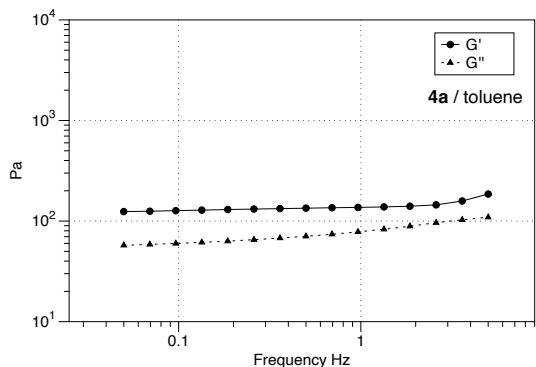

**2a** cyclohexane

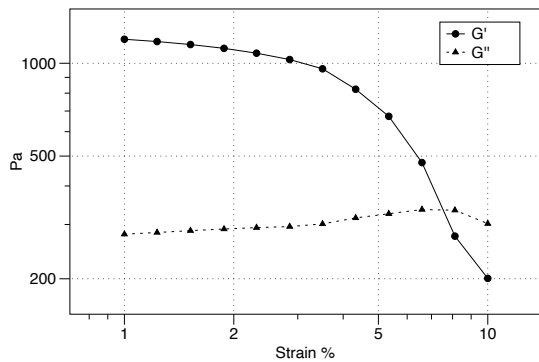

**1a** Ethyl Myristate

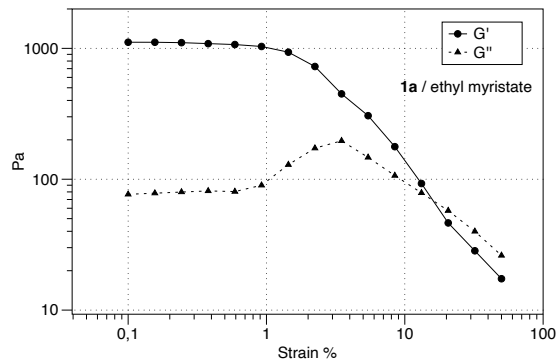

**4b** Cyclohexane

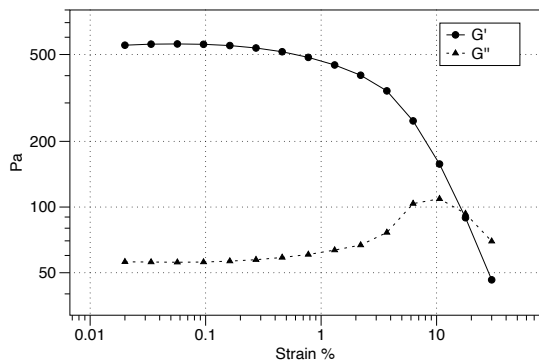

**2a** Ethyl Myristate

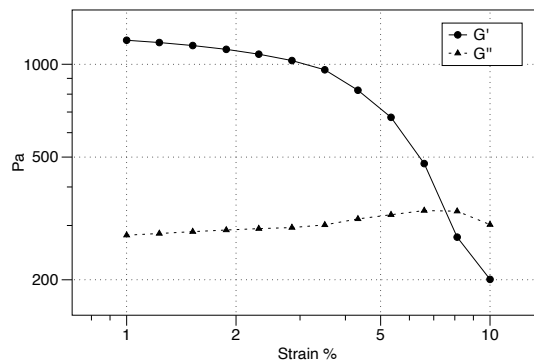

**3a Ethyl Myristate**

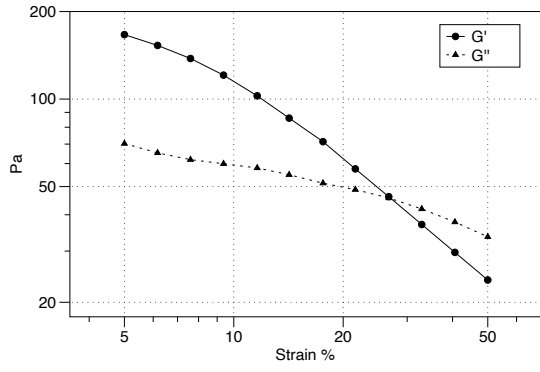

**4b Ethyl Myristate**

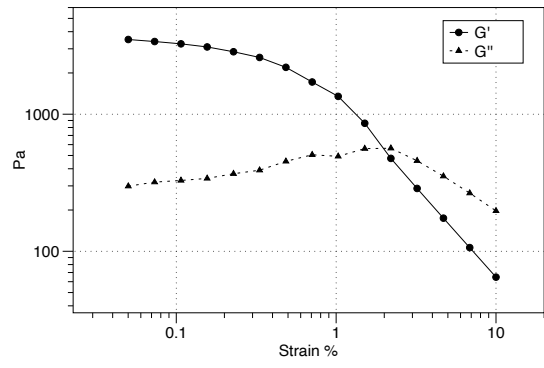

**2b Ethyl Myristate**

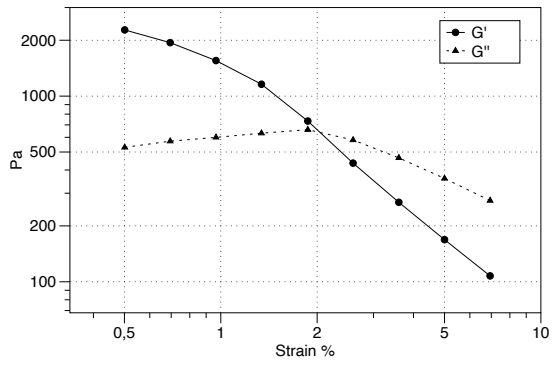

**2c Ethyl Myristate**

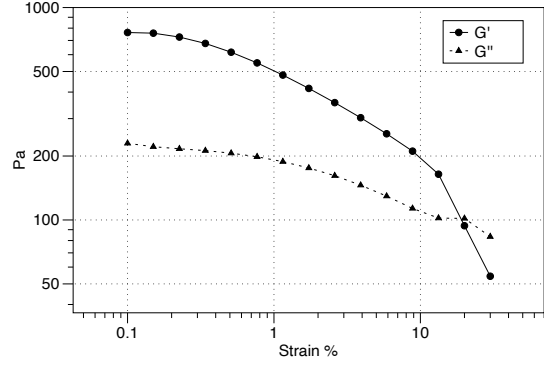

**4a Ethyl Myristate**

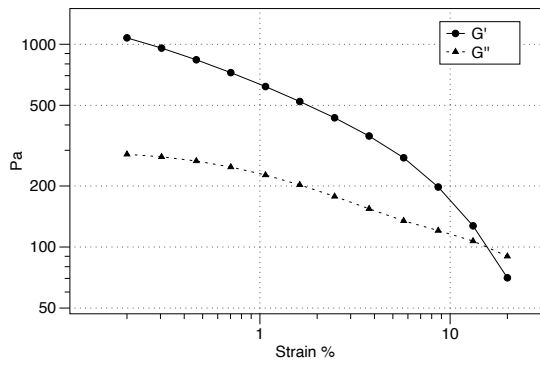

**4c Ethyl Myristate**

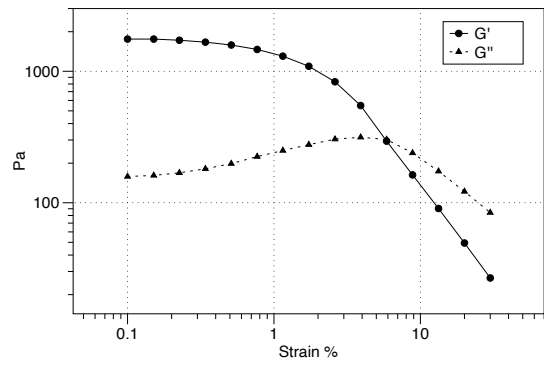

**S3. SEM images of xerogel samples (x10 000), bar = 1  $\mu$ m**  
All xerogels were obtained from freeze-drying of toluene-based gels.

1a

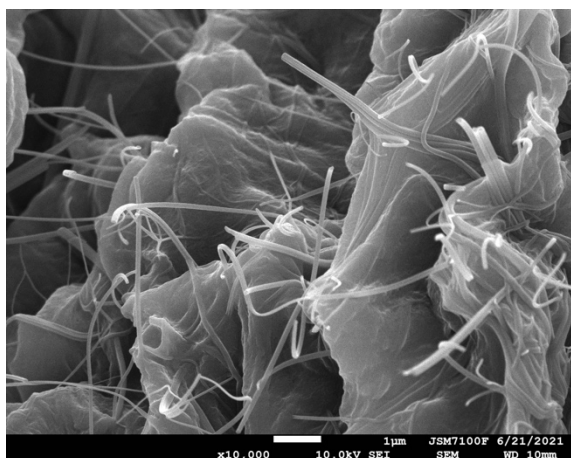

2a (x5000, bar = 5  $\mu$ m)

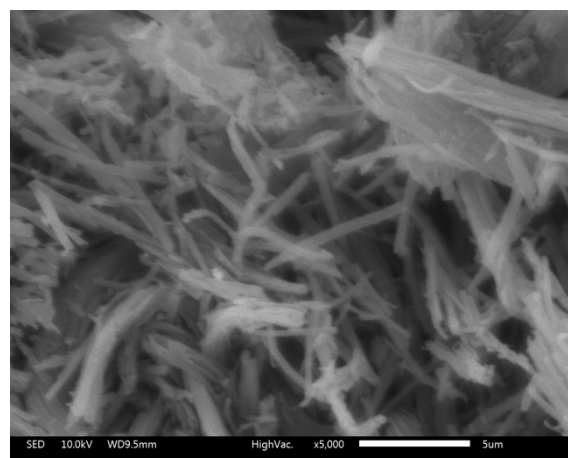

3a

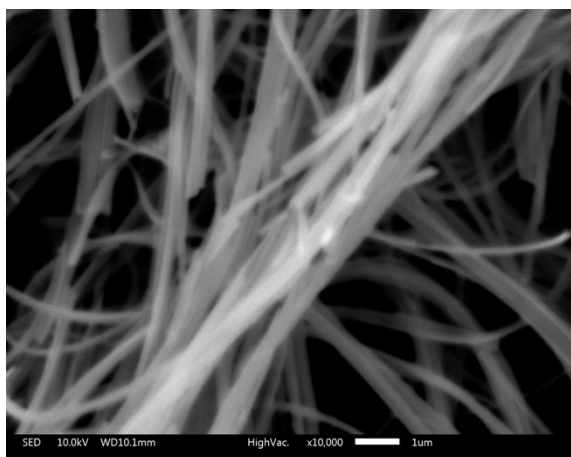

4a

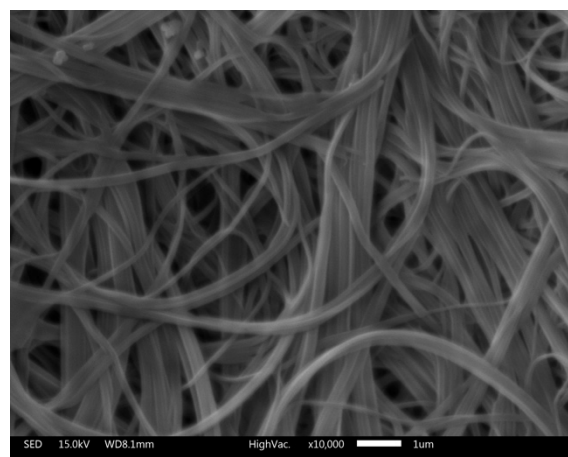

2b

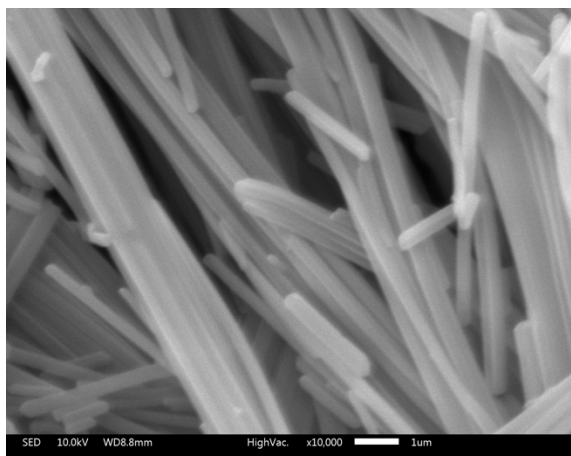

4b

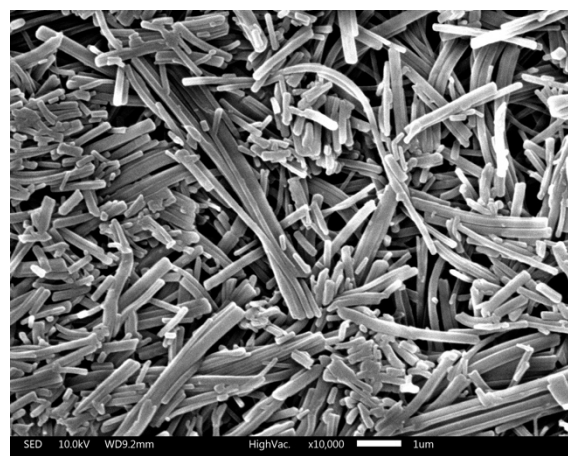



2c

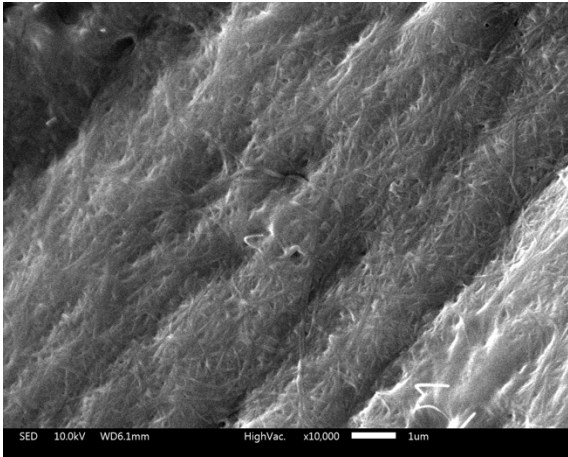

4c

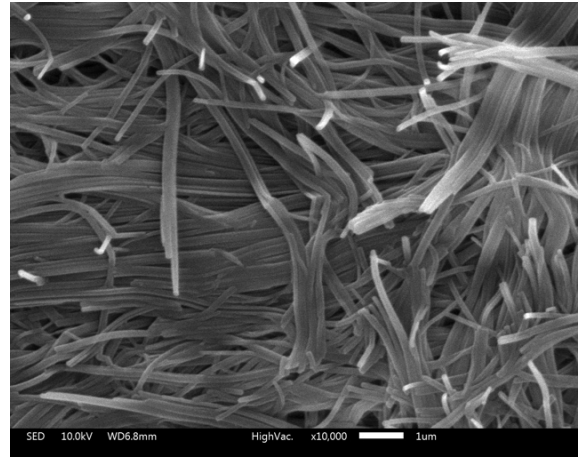

## S4. SAXS Analysis

SAXS analysis (Xerogel of toluene and cyclohexane-based gels with 4b)

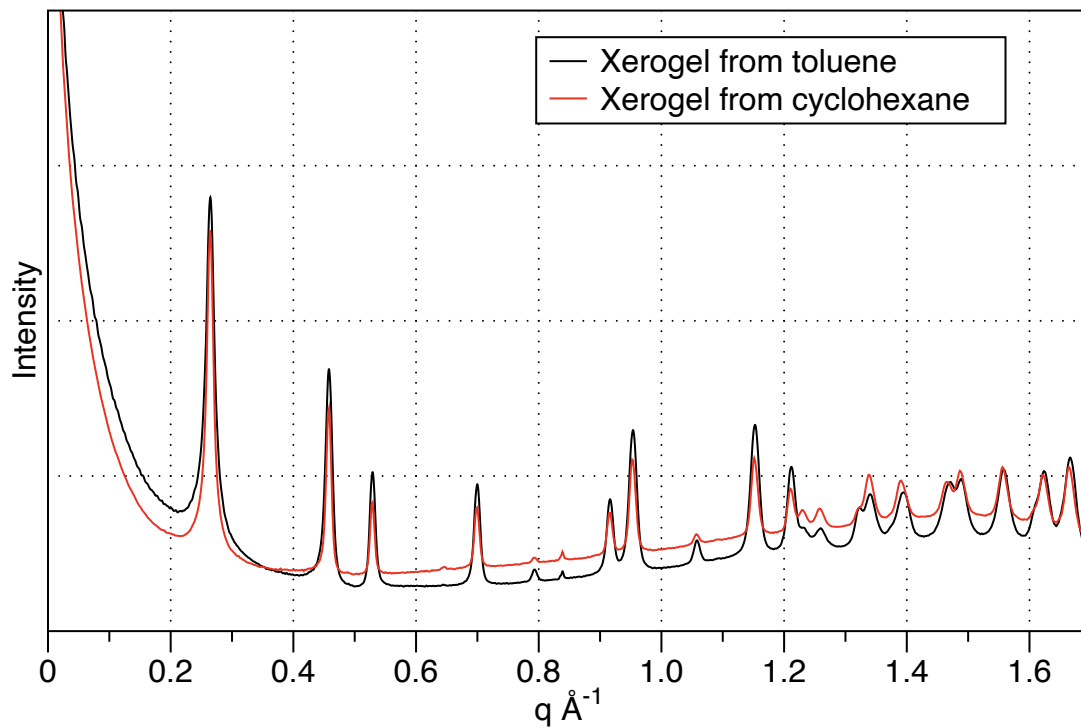

SAXS analysis (Xerogel of toluene-based gel with 3a)

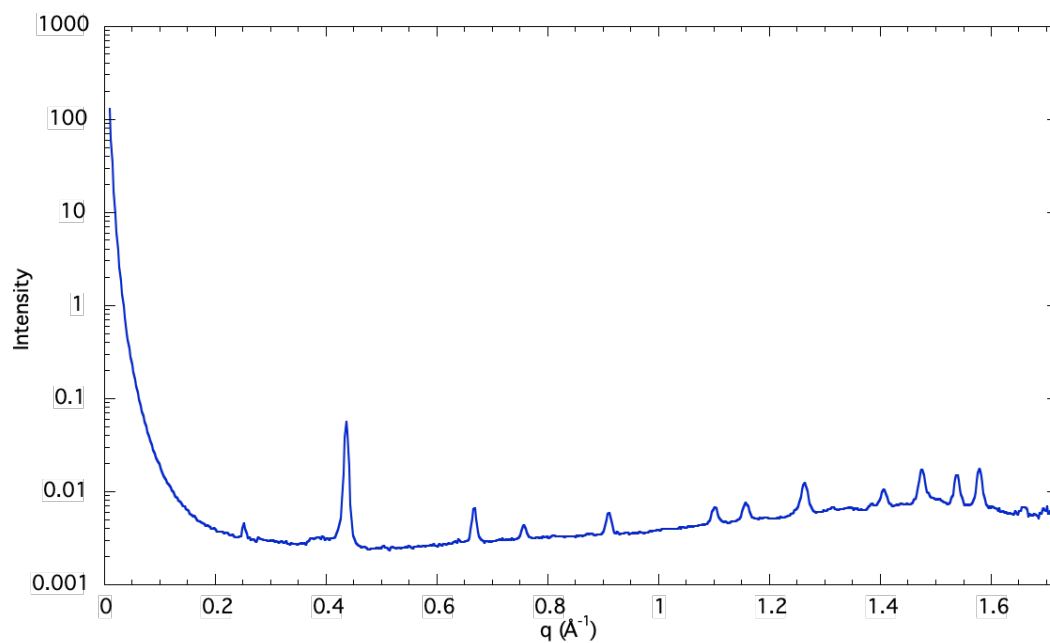

**SAXS analysis (Xerogel of toluene-based gel with 3a)**

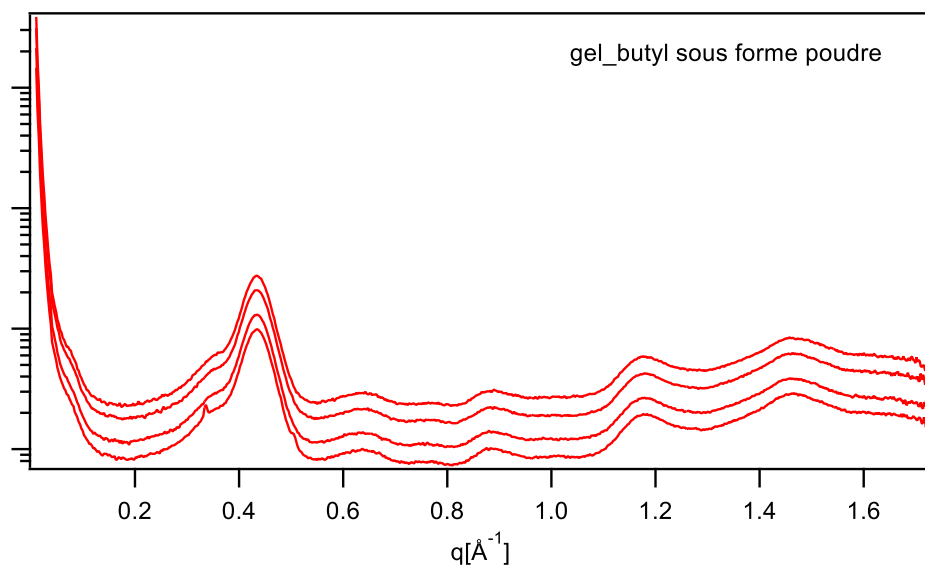

**SAXS analysis (Xerogel of toluene-based gel with 4c)**

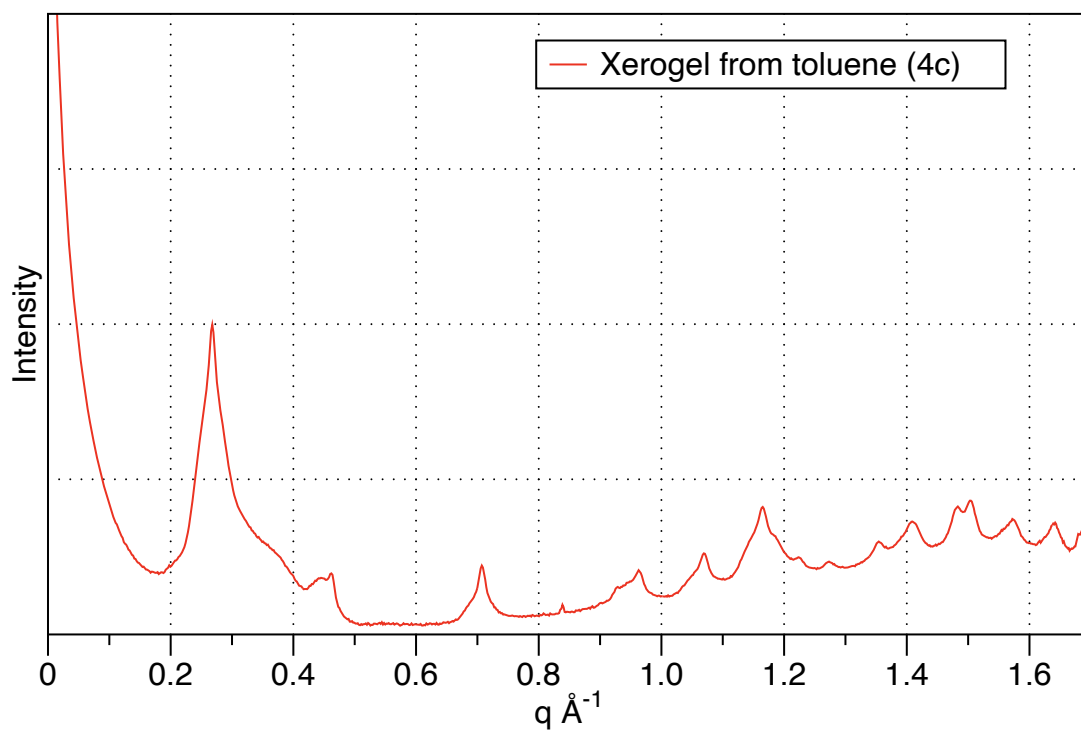

## S5. Hydrolysis experiments

Example of water-sensitivity experiments (Organogelator **2a** in toluene  $12 \text{ mg mL}^{-1}$ ). Immersed in water. See butyl2a.gif file for full experiment.

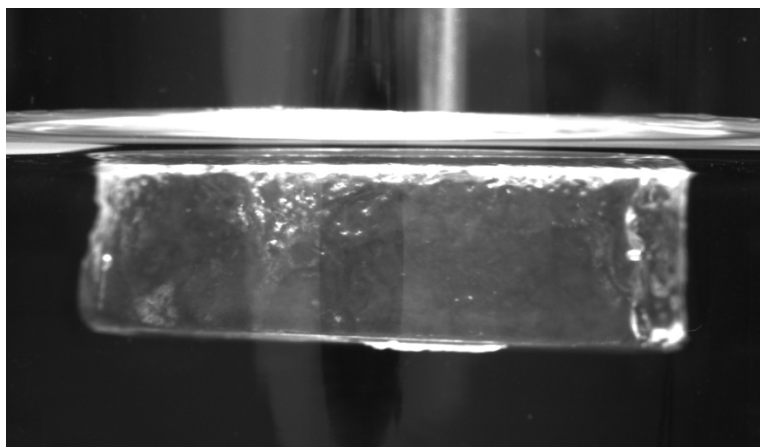

Example of water-sensitivity experiments (Organogelator **2b** in toluene  $16 \text{ mg mL}^{-1}$ ). Immersed in water. See oMebutyl2b.gif file for full experiment.

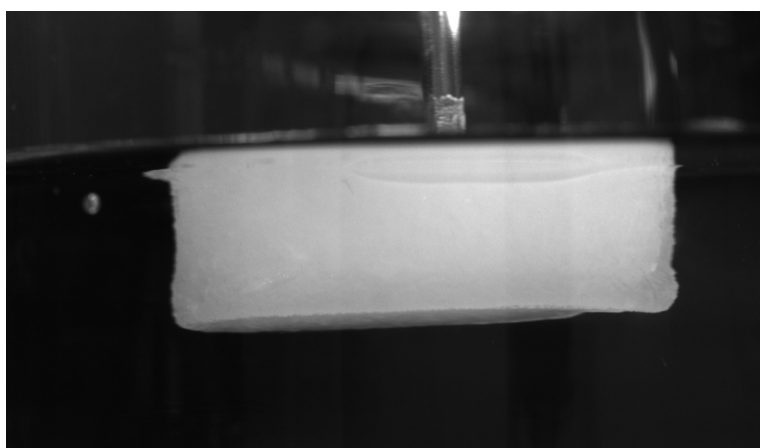

## S6. Theoretical and computational part

### S6.1 - DFT geometric optimizations and levels of theory.

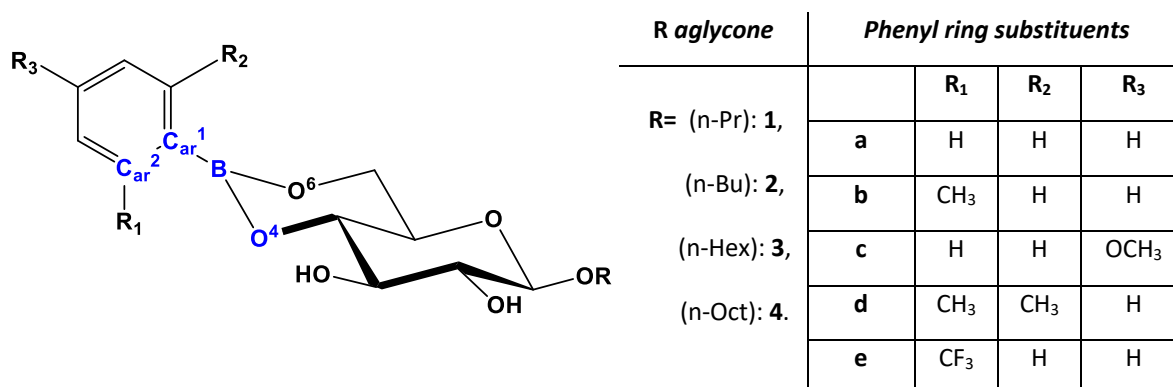

**Figure S6.1:** Main torsion angle on the arylboronate alkylglucosides according to the aromatic ring (R<sub>1</sub>, R<sub>2</sub>, R<sub>3</sub>) substitution and the alkyl chain aglycones (R) ( $\alpha$ : Car<sup>2</sup>-Car<sup>1</sup>-B-O<sup>4</sup>).

| Entry | Functional and basis set combinations | Torsion angle $\alpha$ (°) |       | Distances B...H <sub>3</sub> C (Å) |       | Ref.    |
|-------|---------------------------------------|----------------------------|-------|------------------------------------|-------|---------|
|       |                                       | 2b                         | 2d    | 2b                                 | 2d    |         |
| 1     | LC-BOP/cc-pVTZ #                      | --                         | 65.50 | --                                 | 2.965 | [1]     |
| 2     | B3LYP / 6-311+G(d,p)                  | 1.98                       | 52.11 | 3.078                              | 2.820 | [2-5]   |
| 3     | B3LYP/cc-pVTZ                         | 1.98                       | 51.3  | 3.078                              | 2.912 | [6-8]   |
| 4     | M062X/cc-pVTZ                         | 4.76                       | 46.80 | 3.030                              | 2.890 | [9,10]  |
| 5     | $\omega$ B97XD/cc-pVTZ                | 2.57                       | 54.99 | 3.066                              | 2.815 | [11,12] |

**Table S6.1:** Comparison between different levels of theory to describe conformational modifications of arylboronate of alkylglucosides from chosen parameters. (# used on aryl-1,3,2-dioxaborinane models).

### S6.2 – Characteristic geometric parameters of boronate function at $\omega$ B97XD/cc-pVTZ level of theory.

| Entry | Figure S1 / alkyl chains (R) | 1a     | 2a    | 3a    | 4a    |       |
|-------|------------------------------|--------|-------|-------|-------|-------|
| A1    | Torsion $\alpha$ (°)         | 2.63   | 2.58  | 2.45  | 2.64  |       |
| A2    | Distance (Å) covalent bonds  | B-Car1 | 1.561 | 1.561 | 1.560 | 1.561 |
|       |                              | B-O4   | 1.369 | 1.369 | 1.369 | 1.369 |
|       |                              | B-O6   | 1.369 | 1.369 | 1.369 | 1.369 |

**Table S6.2.1:** Dihedral angles and distances for different alkyl chains at the aglycone position.

| Entry | Figure S1 / butyl chain                          |        | 2a    | 2b    | 2c    | 2d    | 2e    |
|-------|--------------------------------------------------|--------|-------|-------|-------|-------|-------|
| A1    | Torsion $\alpha$ (°)                             |        | 2.58  | 2.57  | 2.68  | 54.99 | 52.31 |
| A2    | Distance (Å)<br>covalent<br>bonds                | B-Car1 | 1.561 | 1.566 | 1.554 | 1.570 | 1.574 |
|       |                                                  | B-O4   | 1.369 | 1.369 | 1.371 | 1.369 | 1.362 |
|       |                                                  | B-O6   | 1.369 | 1.372 | 1.37& | 1.368 | 1.365 |
| A3    | Distance (Å)<br>non-<br>covalent<br>interactions | B..F1  | --    | --    | --    | --    | 2.767 |
|       |                                                  | B..H1  | --    | 3.051 | --    | 2.833 | --    |
|       |                                                  | B..H2  | --    | --    | --    | 2.801 | --    |

**Table S6.2.2:** Dihedral angles and distances for different substituents (R1, R2, R3) on the arylboronate butylglucosides.

| Entry | Figure S1 / octyl chain                      |        | 4a    | 4b    | 4c    | 4d    | 4e    |
|-------|----------------------------------------------|--------|-------|-------|-------|-------|-------|
| A1    | Torsion $\alpha$ (°)                         |        | 2.64  | 2.59  | 2.39  | 54.47 | 52.2  |
| A2    | Distance (Å)<br>covalent<br>bonds            | B-Car1 | 1.561 | 1.566 | 1.554 | 1.570 | 1.574 |
|       |                                              | B-O4   | 1.369 | 1.369 | 1.371 | 1.369 | 1.362 |
|       |                                              | B-O6   | 1.369 | 1.372 | 1.371 | 1.368 | 1.365 |
| A3    | Distance (Å)<br>non-covalent<br>interactions | B..F1  | --    | --    | --    | --    | 2.837 |
|       |                                              | B..H1  | --    | 3.044 | --    | 2.834 | --    |
|       |                                              | B..H2  | --    | --    | --    | 2.811 | --    |

**Table S6.2.3:** Dihedral angles and distances for different substituents (R1, R2, R3) on the arylboronate octylglucosides.

### S6.3 – Molecular orbitals of arylboronates: energy levels and representations.

In order to describe electronic effects, we compared electronic structures for all arylboronate alkylglucosides (compounds: **Cp**) extracting energy levels of molecular orbitals (**MO**, **Tables S6.3.1, S6.3.2, S6.3.3**) and visualizing representations of frontier molecular orbitals (**Figures S6.3.1, S6.3.2, S6.3.3**) as presented here at the selected level of theory  $\omega$ B97XD/cc-pVTZ.

| MO / Cp | 1a       | 2a       | 3a       | 4a       |
|---------|----------|----------|----------|----------|
| LUMO+5  | 3.2552   | 3.2509   | 3.2343   | 3.1834   |
| LUMO+4  | 3.0588   | 3.0522   | 3.0201   | 3.0016   |
| LUMO+3  | 2.8599   | 2.8525   | 2.8424   | 2.8411   |
| LUMO+2  | 2.8324   | 2.8280   | 2.8291   | 2.8286   |
| LUMO+1  | 1.9124   | 1.9137   | 1.9156   | 1.9164   |
| LUMO    | 1.1491   | 1.1507   | 1.1529   | 1.1537   |
| HOMO    | -8.7653  | -8.7631  | -8.7615  | -8.7606  |
| HOMO+1  | -8.7832  | -8.7816  | -8.7797  | -8.7791  |
| HOMO+2  | -9.4943  | -9.4894  | -9.4845  | -9.4831  |
| HOMO+3  | -10.0505 | -10.0461 | -10.0413 | -10.0390 |
| HOMO+4  | -10.2151 | -10.2050 | -10.1960 | -10.1917 |
| HOMO+5  | -10.2798 | -10.2769 | -10.2736 | -10.2725 |

**Table S6.3.1:** Molecular orbital energy levels for different alkyl chains at the aglycone position.

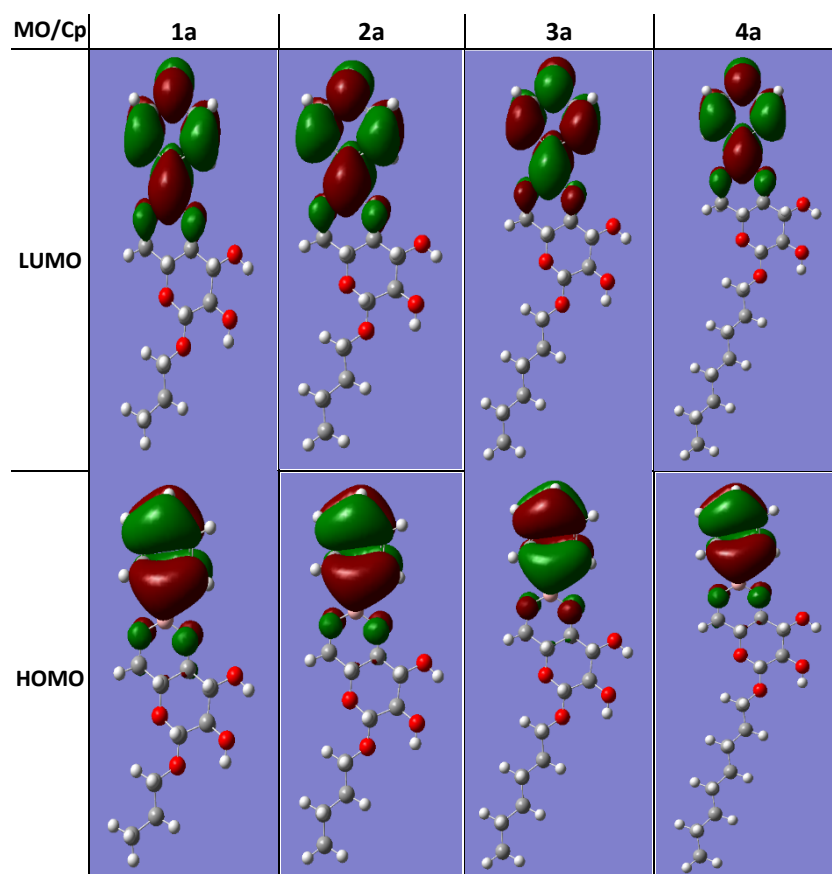

**Figure S6.3.1:** Representations of the frontier molecular orbitals for phenylboronates of glucosides with different alkyl chains at the aglycone position.

| MO / Cp | 2a       | 2b       | 2c       | 2d       | 2e       |
|---------|----------|----------|----------|----------|----------|
| LUMO+5  | 3.2509   | 3.2117   | 3.2865   | 3.0204   | 3.1586   |
| LUMO+4  | 3.0522   | 3.0386   | 3.0865   | 2.9801   | 3.0098   |
| LUMO+3  | 2.8525   | 2.8408   | 2.8890   | 2.8299   | 2.8414   |
| LUMO+2  | 2.8280   | 2.8136   | 2.8596   | 2.7170   | 2.7848   |
| LUMO+1  | 1.9137   | 2.0648   | 1.8977   | 2.1537   | 1.3393   |
| LUMO    | 1.1507   | 1.1511   | 1.4617   | 1.4245   | 0.9211   |
| HOMO    | -8.7631  | -8.4088  | -7.9315  | -8.2629  | -9.2146  |
| HOMO+1  | -8.7816  | -8.6866  | -8.8243  | -8.4458  | -9.3223  |
| HOMO+2  | -9.4894  | -9.4929  | -9.4355  | -9.5098  | -9.5013  |
| HOMO+3  | -10.0461 | -10.0728 | -10.0026 | -10.0662 | -10.0205 |
| HOMO+4  | -10.2050 | -10.2094 | -10.1609 | -10.2118 | -10.2238 |
| HOMO+5  | -10.2769 | -10.2679 | -10.1900 | -10.2502 | -10.3811 |

**Table S6.3.2:** Molecular orbital energy levels for a *n*-butyl chain with different substituents (R1, R2, R3).

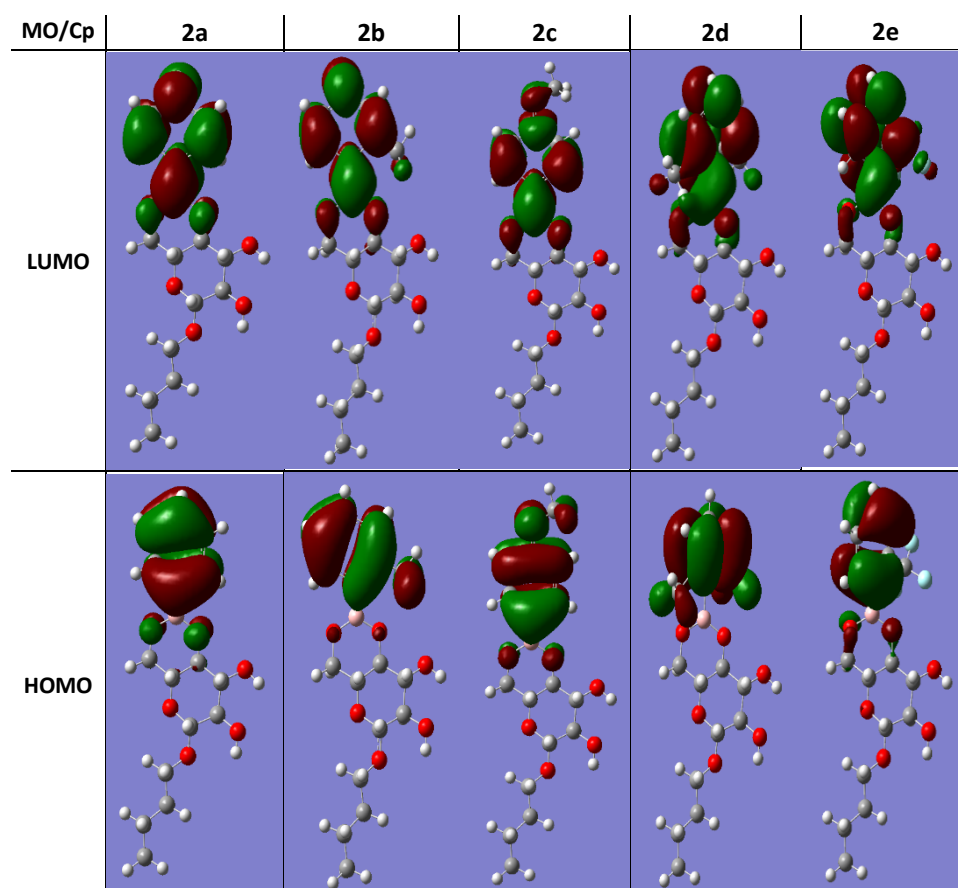

**Figure S6.3.2:** Representations of the frontier molecular orbitals for arylboronates butylglucosides with different aryl substituents (R1, R2, R3).



| MO / Cp | 4a       | 4b       | 4c       | 4d       | 4e       |
|---------|----------|----------|----------|----------|----------|
| LUMO+5  | 3.1834   | 3.1788   | 3.2133   | 3.0030   | 3.1254   |
| LUMO+4  | 3.0016   | 2.9894   | 3.0316   | 2.9633   | 2.9766   |
| LUMO+3  | 2.8411   | 2.8291   | 2.8852   | 2.8199   | 2.8305   |
| LUMO+2  | 2.8286   | 2.8169   | 2.8544   | 2.7224   | 2.7869   |
| LUMO+1  | 1.9165   | 2.0677   | 1.9048   | 2.1581   | 1.3412   |
| LUMO    | 1.1537   | 1.1554   | 1.4604   | 1.4196   | 0.9233   |
| HOMO    | -8.7607  | -8.4055  | -7.9312  | -8.2605  | -9.2124  |
| HOMO+1  | -8.7792  | -8.6834  | -8.8197  | -8.4436  | -9.3198  |
| HOMO+2  | -9.4831  | -9.4869  | -9.4238  | -9.5030  | -9.4951  |
| HOMO+3  | -10.0390 | -10.0657 | -9.9846  | -10.0594 | -10.0143 |
| HOMO+4  | -10.1917 | -10.1972 | -10.1454 | -10.2004 | -10.2105 |
| HOMO+5  | -10.2725 | -10.2643 | -10.1846 | -10.2431 | -10.3756 |

**Table S6.3.3:** Molecular orbital energy levels for a n-octyl chain with different aryl substituents (R1, R2, R3).

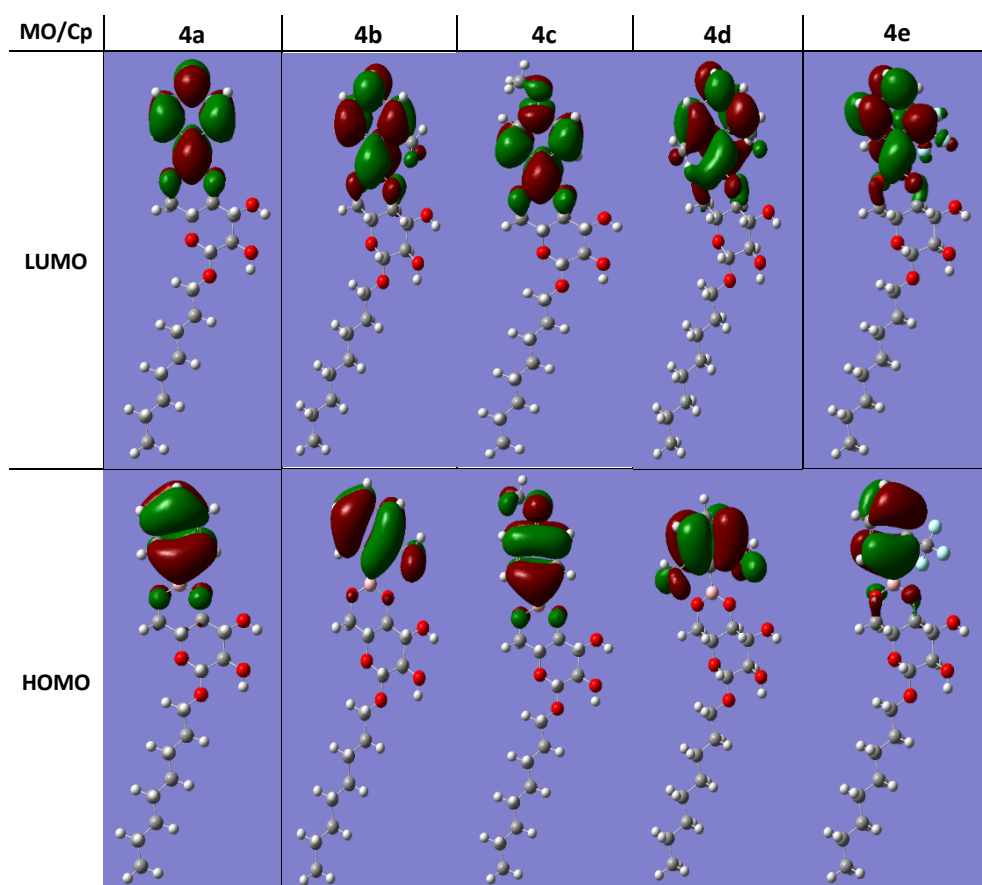

**Figure S3.3:** Representations of the frontier molecular orbitals for arylboronates octylglucosides with different aryl substituents (R1, R2, R3).

#### S6.4 - Supporting references

- [1] N. Shimada, S. Urata, K. Fukuhara, T. Tsuneda, K. Makino **2018**, 2,6-Bis(trifluoromethyl)phenylboronic Esters as Protective Groups for Diols: A Protection/Deprotection Protocol for Use under Mild Conditions, *Org. Lett.* **20**, 6064–6068.
- [2] L. Legentil. Y. Cabezas. O. Tasseau. C. Tellier. F. Daligault. V. Ferrières **2017**, Regioselective Galactofuranosylation for the Synthesis of Disaccharide Patterns Found in Pathogenic Microorganisms, *J. Org. Chem.* **82**, 7114–7122.
- [3] (a) I. D. I. Ramaite. T. van Ree **2017**, Computational Studies of Substituted Phenylboronic Acids in Common Electrolyte Solvents, *Arab. J. Sci. Eng.* **42**, 4227-4238 ; (b) A. W. Bebeda. T. van Ree **2015**, Conformational Preferences and Electrochemical Performance of Ethyleneoxy Phenylboronate Electrolyte Additives, *Arab. J. Sci. Eng.* **40**, 2841–2851.
- [4] M. Tanaka, A. Nakagawa, N. Nishi, K. Iijima, R. Sawa, D. Takahashi, K. Toshima **2018**, Boronic-Acid-Catalyzed Regioselective and 1,2-cis-Stereoselective Glycosylation of Unprotected Sugar Acceptors via S<sub>N</sub>i-Type Mechanism, *J. Am. Chem. Soc.* **140**, 3644–3651.
- [5] S. Wan. J. Guo. J. Kim. H. Ihee. D. Jiang **2009**, A Belt-Shaped. Blue Luminescent. and Semiconducting Covalent Organic Framework, *Angew. Chem. Int. Ed.* **47**, 8826–8830.
- [6] E. Borowska, K. Durka, S. Lulinski, J. Serwatowski, K. Wozniak **2012**, On the Directing Effect of Boronate Groups in the Lithiation of Boronated Thiophenes, *Eur. J. Org. Chem.* **2012**, 2208–2218.
- [7] C. Vahlberg, M. Linares, P. Norman, K. Uvdal **2012**, Phenylboronic Ester- and Phenylboronic Acid-Terminated Alkanethiols on Gold Surfaces, *J. Phys. Chem. C* **116**, 796–806.
- [8] J. N. Bentley, S. A. Simoes, E. Pradhan, T. Zeng, C. B. Caputo **2021**, The synthesis, properties, and reactivity of Lewis acidic aminoboranes, *Org. Biomol. Chem.* **19**, 4796–4802.
- [9] P. Pacholak. K. Gontarczyk. Radosław Kaminski. Krzysztof Durka. S. Lulinski **2020**, Boronate Covalent and Hybrid Organic Frameworks Featuring PIII and P=O Lewis Base Sites, *Chem. Eur. J.* **26**. 12758 – 12768.
- [10] A. J. Cardenas-Valenzuela, J. Baldenebro-Lopez, J. A. Guerrero-Alvarez, H. Höpfl, D. Glossman-Mitnik, J. J. Campos-Gaxiolaa, A. Cruz-Enriquez **2018**, Supramolecular arrangement and photophysical properties of a dinuclear cyanophenylboronic acid ester, *Acta Cryst.* **C74**, 452–459.
- [11] H. Li, H. Li, Q. Dai. H. Li, J.-L. Brédas **2018**, Hydrolytic Stability of Boronate Ester-Linked Covalent Organic Frameworks. *Adv. Theory Simul.* **1**, 1700015, 1-9.
- [12] K. J. Donald, U. R. Gaillard, N. Walker **2022**, On Neutral Unsaturated Oroboric Borylenes, *J. Phys. Chem. A*, **126**, 5173-5185.

## S7. Gelation data in Hansen space

Graph were plotted following the methodology of Bouteiller *et al. Soft Matter* **2018**, *14*, 4805-4809.  
doi:10.1039/C8SM00562A.

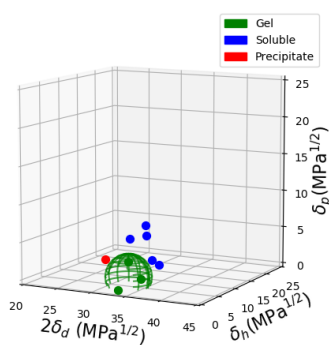

Gelation data in Hansen space for **2a**

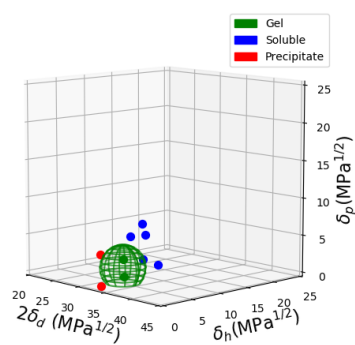

Gelation data in Hansen space for **4a**

## S8. <sup>1</sup>H NMR at variable temperature

S8.1. Variable temperature <sup>1</sup>H NMR of gel in toluene-d<sub>8</sub> with **2a** (25°C, 30°C, 40°C, 50°C, 60°C, 70°C, 80°C, from bottom to top).

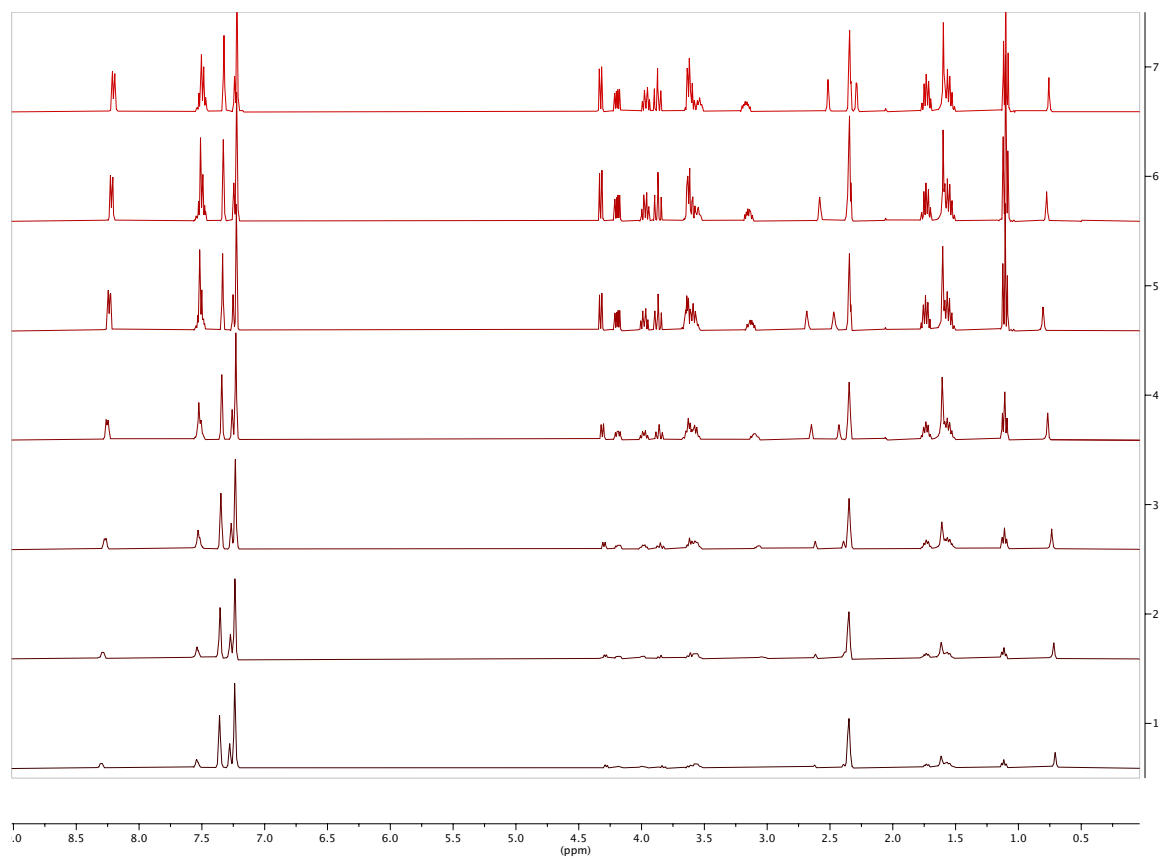

S8.2. Variable temperature  $^1\text{H}$  NMR of gel in toluene-d8 with **3a** (25°C, 30°C, 40°C, 50°C, 60°C, 70°C, 80°C, from bottom to top).

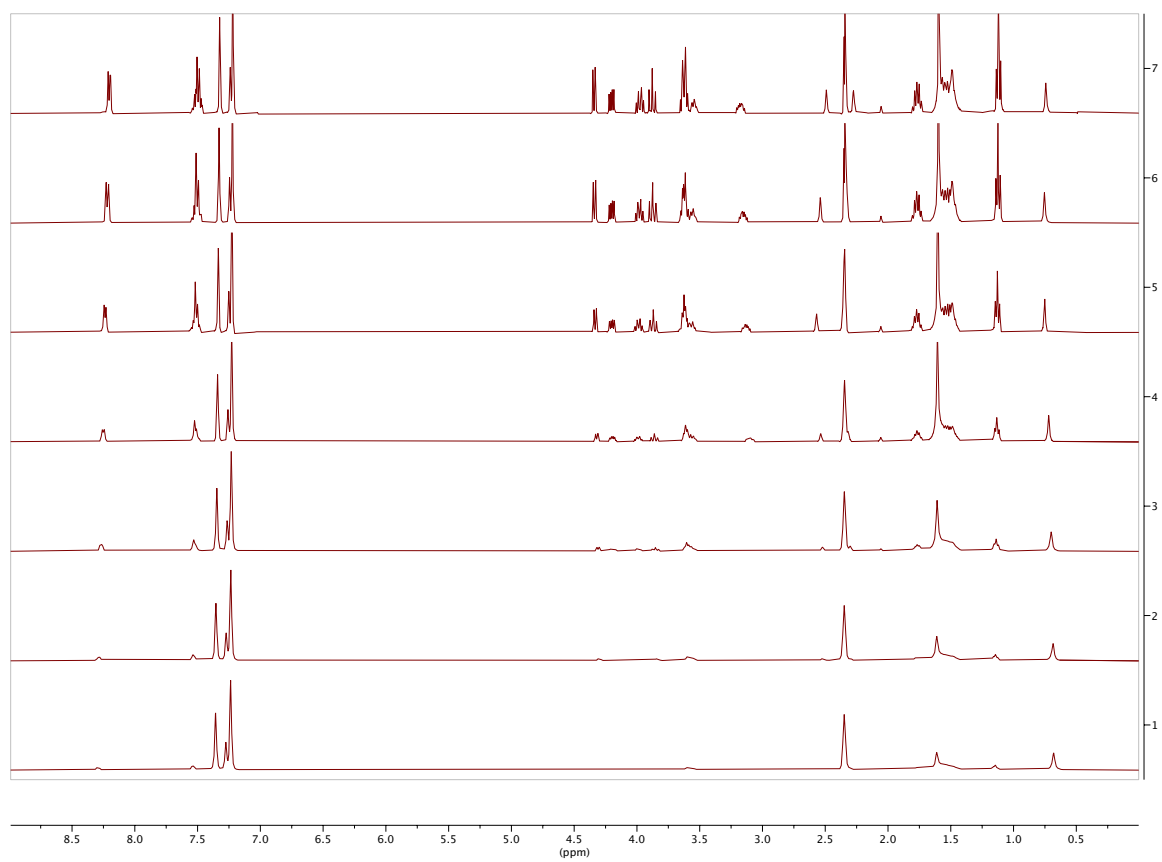

S8.3. Variable temperature  $^1\text{H}$  NMR of gel in toluene-d8 with **4a** (25°C, 30°C, 40°C, 50°C, 60°C, 70°C, 80°C, from bottom to top).

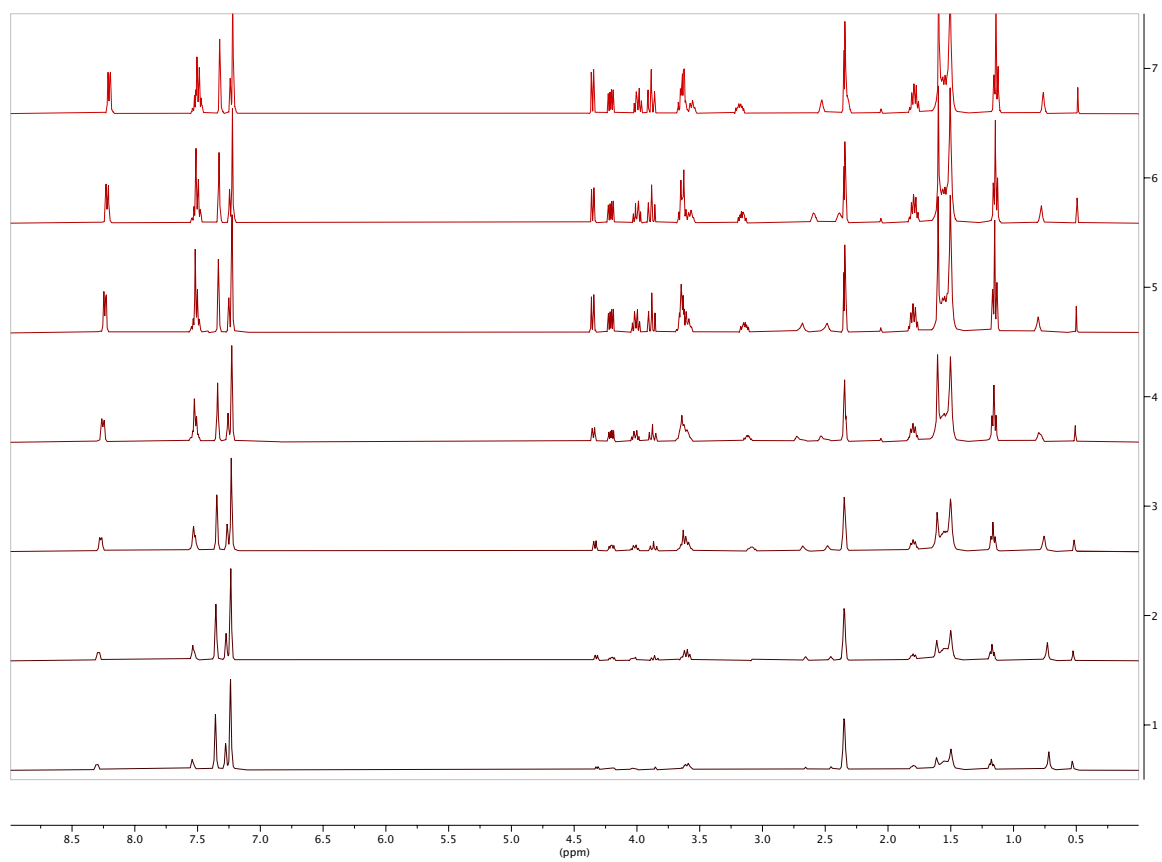

Supplement: d2sm01305c2.pdf [file d2sm01305c2.pdf]
